11 **Abstract**

12 Infant avoidance and aggression are promoted by activation of the Urocortin-3  
13 expressing neurons of the perifornical area of hypothalamus (PeFA<sup>Ucn3</sup>) in male and female  
14 mice. PeFA<sup>Ucn3</sup> neurons have been implicated in stress, and stress is known to reduce maternal  
15 behavior. We asked how chronic restraint stress (CRS) affects infant-directed behavior in virgin  
16 and lactating females and what role PeFA<sup>Ucn3</sup> neurons play in this process. Here we show that  
17 infant-directed behavior increases activity in the PeFA<sup>Ucn3</sup> neurons in virgin and lactating  
18 females. Chemogenetic inhibition of PeFA<sup>Ucn3</sup> neurons facilitates pup retrieval in virgin females.  
19 CRS reduces pup retrieval in virgin females and increases activity of PeFA<sup>Ucn3</sup> neurons but does  
20 not affect maternal behavior in mothers. Inhibition of PeFA<sup>Ucn3</sup> neurons blocks stress-induced  
21 deficits in pup-directed behavior in virgin females. Together, these data illustrate the critical role  
22 for PeFA<sup>Ucn3</sup> neuronal activity in mediating the impact of chronic stress on female infant-directed  
23 behavior.

24

25 **Significance statement**

26 While a large body of research has studied the impact of maternal stress on offspring,  
27 few studies have focused on the neural circuitry underlying reduced maternal behavior in  
28 stressed mothers. In this study, we examine the neural substrates involved in reduced infant-  
29 directed behavior caused by chronic stress. We find that perifornical area neurons expressing  
30 the neuropeptide urocortin-3 are critical mediators of the impact of stress on infant-directed  
31 behavior in females.

32

## 33 **Introduction**

34           Many decades of research have focused on the neurobiology of maternal behavior,  
35 revealing common mechanisms and pathways involved in infant caregiving behavior across a  
36 variety of species (Numan & Insel, 2003; Numan, 2020). Studies have converged on the critical  
37 role of the medial preoptic area of hypothalamus in orchestrating the behavioral responses of  
38 mothers to their young in frogs, fish, birds, and rodents (Numan, 1974; Slawski & Buntin, 1995;  
39 Fischer *et al.*, 2019; Maruska *et al.*, 2020). Recently, it has been appreciated that these  
40 mechanisms may also be involved in paternal behaviors as well, suggesting a core circuitry that  
41 exists in both sexes to promote caregiving (O'Connell *et al.*, 2012; Wu *et al.*, 2014; Kohl *et al.*,  
42 2018). Moreover, it has been well-documented that neural plasticity mechanisms underlie the  
43 facilitation of infant care behavior, including alloparental care towards unrelated young,  
44 particularly in females (Numan & Insel, 2003).

45           In the absence of caregiving behavior, it is possible to observe neglect or even  
46 aggression toward infants by adults. Studies have identified circuit nodes in the brain, including  
47 the medial and posterior amygdala, the bed nucleus of stria terminalis, and the perifornical area  
48 of hypothalamus, that modulate expression of infant-directed neglect and aggression  
49 (Tsuneoka *et al.*, 2015; Chen *et al.*, 2019; Sato *et al.*, 2020; Autry *et al.*, 2021). We wondered if  
50 this anti-parental circuitry may be active in neglectful animals including virgin females or  
51 stressed virgin and lactating females.

52           Clinical research clearly shows that stress is a critical risk factor for postpartum mental  
53 illnesses including postpartum depression or anxiety which affect up to 25% of women and 10%  
54 of men annually in the United States (Paulson & Bazemore, 2010; Wisner *et al.*, 2013).  
55 However, there are few preclinical studies that examine the neurobiology underlying reduced  
56 parent-infant bonding or associated symptoms in animal models (Nephew & Bridges, 2011;  
57 Zoubovsky *et al.*, 2020; Rosinger *et al.*, 2021). Extant research has focused on the impact of  
58 maternal stress as a model of early life stress either pre- or postnatally on behavior outcomes in

59 offspring, often with profound behavioral, physiological, and neurobiological impacts on young  
60 raised by stressed mothers (Cameron *et al.*, 2005; Wang *et al.*, 2011; Singh-Taylor *et al.*, 2015;  
61 Delpech *et al.*, 2016; Feifel *et al.*, 2017; Kronman *et al.*, 2021; Rincon-Cortes & Grace, 2021).  
62 During lactation, females are hyporesponsive to acute stress due to hormonal changes that  
63 impact the Hypothalamic-Pituitary-Adrenal (HPA) axis regulation (Walker *et al.*, 2001; Brunton *et*  
64 *al.*, 2008). HPA axis hypo-responsivity is thought to be protective of anxiety-related behavior  
65 and adult-pup interactions in lactating females (Miller *et al.*, 2011; Medina *et al.*, 2021).  
66 However, chronic stress has been documented to have a long-lasting impact on the regulation  
67 of the HPA axis, leading to reduced parenting, and how the underlying neurobiology is affected  
68 remains poorly understood (Carini *et al.*, 2013; Murgatroyd & Nephew, 2013; Murgatroyd *et al.*,  
69 2015).

70 Ucn3 is a member of the corticotropin releasing factor (CRF) family of stress hormones  
71 and has the highest endogenous binding affinity for CRF receptor 2 (CRFR2). Previous studies  
72 of this group of neurons suggest that they are sensitive to stress and adrenalectomy (loss of  
73 stress hormones) (Jamieson *et al.*, 2006). Overexpression of Ucn3 in the brain leads to  
74 increased anxiety- and depression-related behaviors and results in a blunted HPA response to  
75 stress (Neufeld-Cohen *et al.*, 2012). Furthermore, overexpression of Ucn3 specifically in the  
76 PeFA is associated with enhanced anxiety-like behaviors in mice (Kuperman *et al.*, 2010).  
77 Social discrimination abilities are altered in a sex-specific manner in total Ucn3 knockout mice  
78 (Deussing *et al.*, 2010). Taken together, these studies suggest that PeFA Ucn3 cells mediate  
79 stress-induced behavioral changes.

80 Thus, we hypothesized that chronic stress would negatively affect infant-directed  
81 behavior in females and that this disruption is dependent on activation of perifornical area  
82 urocortin-3 expressing neurons. We set out to determine if anti-parental circuit components,  
83 specifically the urocortin-3 positive neurons in the perifornical area of hypothalamus were more  
84 active in naïve or stressed females, and if we could recover parental behavior by blocking

85 activation of this anti-parental circuit node. We find that increased parental behavior is  
86 accompanied by decreased activity in perifornical area urocortin-3 expressing neurons and  
87 blocking activity in these cells enhances parental behavior in naïve females. Chronic stress  
88 reduces alloparental behavior in naïve females and this stress-induced behavioral effect is  
89 occluded by inhibition of perifornical area urocortin-3 cells. In stressed lactating females,  
90 parental behavior is preserved and perifornical area urocortin-3 cells are less activated in stress.  
91 Together, these data reveal a critical role for perifornical urocortin-3 neurons in the expression  
92 of alloparental behavior in female mice under both normal and pathological conditions.

### 93 **Materials and Methods**

#### 94 Animals

95 Mice were maintained on a 12h:12h dark light cycle (10:30am-10:30 pm dark phase)  
96 with access to food and water ad libitum. All experiments were performed in accordance with  
97 NIH guidelines and approved by the Albert Einstein College of Medicine Institutional Animal  
98 Care and Use Committee (IACUC; protocol 20180110; 20180111; 00001386).

99 C57BL/6J sexually naïve female and pregnant female (E14) mice were ordered from  
100 Jackson Laboratories (Bar Harbor, ME) aged at 6-8 weeks. Ucn3::Cre BAC transgenic line  
101 (STOCK Tg(Ucn3-cre) KF43Gsat/Mmcd 032078-UCD; obtained from laboratory of Catherine  
102 Dulac, Harvard University) were genotyped at weaning (3 weeks of age) and used in  
103 experiments at age 2-5 months. Animals received from Jackson Laboratories habituated to our  
104 facility for 7 days prior to behavioral testing.

#### 105 Corticosterone Measure

106 Trunk blood samples were taken at the time of sacrifice and blood serum was isolated  
107 from blood samples by centrifugation. A high-sensitivity corticosterone (CORT) enzyme  
108 immunoassay (EIA) was used and analyzed according to manufacturer's instructions  
109 (Immunodiagnostic Systems Ltd, Fountain Hills, AZ, USA) as previously described (Autry *et al.*,  
110 2009). Briefly, percent binding (B/Bo%) of each calibrator, control and sample was calculated by

111 dividing the mean absorbance over the mean absorbance for '0' calibrator and multiplied by  
112 100. A calibration curve was used to plot B/Bo% on the ordinate against concentration of  
113 corticosterone. A 4pl curve fit was applied.

#### 114 Chronic restraint stress model

115 Virgin and lactating female mice were used. Lactating females were restrained starting  
116 from approximately postpartum (PP) day 2. Both stressed and unstressed mice were brought to  
117 a test room under dim red light during their dark cycle. All animals were weighed, and females  
118 were either placed back into their home cage or placed into a 50 mL conical tube for one hour.  
119 Humidity and temperature in the test room was recorded each day. On the last day of stress,  
120 females remained in the test room for 1-2 hours before being exposed to a foreign-born pup  
121 (see Parental Behavior).

122 Animals injected with AAV1/DIO-hM4Di (see chemogenetics) recovered from surgery at  
123 least 1 week before the start of restraint. For the stressed virgin female group, mice were  
124 excluded from the stressed group (n=4 females) based on open field test behavior that was  
125 indistinguishable from control. For the groups that received AAV1/DIO-hM4Di injections,  
126 females were excluded if they did not show adequate recombination of the DREADD construct  
127 (n=2, virgin females Figure 2; n=0 stressed virgin females Figure 6).

#### 128 Intruder stress model

129 Lactating females were stressed starting from approximately postpartum (PP) day 2.  
130 Both stressed and unstressed mice were brought to a test room under dim red light during their  
131 dark cycle. All animals were weighed, and females were placed back into their home cage and  
132 either placed back on the housing rack or had an intact adult male intruder (C57, ~2 months old)  
133 introduced into their home cage for 10 minutes as described in previous studies (Carini *et al.*,  
134 2013; Murgatroyd *et al.*, 2016). In the event the male was too aggressive toward pups, the  
135 intruder stress period was curtailed. Humidity and temperature in the test room was recorded

136 each day. On the last day of stress, females remained in the test room for 1-2 hours before  
137 being exposed to a foreign-born pup (see Parental Behavior).

138

### 139 Behavior assays

140 Mice were individually housed for at least 1 week prior to testing. Experiments were  
141 conducted during the dark phase under dim red light. Tests were recorded by Fly Capture  
142 cameras (Point Grey, Richmond, BC, Canada) and behaviors were scored by an observer blind  
143 to experimental condition using Observer XT13 Software or Ethovision XT 13 (Noldus  
144 Information Technology, Leesburg, VA, USA). Animals were tested for a single behavior per  
145 session with at least 24 hours between sessions.

### 146 *Parental behavior*

147 Parental behavior tests were conducted in the mouse's home cage as previously  
148 described (Wu *et al.*, 2014). Mice were habituated to the testing environment for 10 minutes.  
149 One to two C57BL6/J pups 1-4 days old were presented in the cage in the opposite corner to  
150 the nest. Test sessions started either at pup introduction or pup approach (female first touches  
151 the pup with its snout) and lasted for 10- 15 minutes. If the mouse became aggressive by biting  
152 and wounding the pup, the session was immediately halted, and the pup was euthanized. The  
153 following behaviors were quantified: latency to retrieve, pup investigation (sniffing, close contact  
154 with snout), grooming (handling with forepaws and licking), nest building, time spent in the nest,  
155 crouching, latency to attack (latency to bite and wound), aggression (roughly handling,  
156 aggressively grooming, aggressive carrying with no retrieval), and tail rattling. A 'parenting  
157 behavior' index was calculated as the sum of duration of grooming, nest building, time spent in  
158 the nest, and crouching.

### 159 *Open field*

160 Mice were assessed for activity in a 45cm x 45 cm open field at 40 lux for 5 min as  
161 previously described (Autry *et al.*, 2009). Center was considered 15 cm x 15 cm and borders

162 were 5 cm around the perimeter of the box. Time and frequency in center and borders as well  
163 as distance and velocity were calculated using Ethovision XT13.

164 Behavioral ethograms were made in Matlab using custom code.

#### 165 Fluorescence in situ hybridization

166 Fluorescence in situ hybridization (FISH) was performed as recommended by ACD Bio  
167 (Newark, CA, USA) using V1 RNAscope reagents. Briefly, fresh brain tissue was collected from  
168 animals housed in their home cages or 35 min after the start of the behavior tests for immediate  
169 early gene (*Fos*) studies. Brains were embedded in OCT (Tissue-Tek) and frozen with dry ice.  
170 25 $\mu$ m cryosections were used for mRNA in situ. Adjacent sections from each brain  
171 were collected over replicate slides to stain with multiple probes. Protease 3 was used to digest  
172 tissue. *Fos* (Cat No. 316921), *Ucn3* (Cat No. 464861), and *Crh* (Cat No. 316091) probes were  
173 used as per manufacturer's instructions. Slides were mounted using Prolong Gold with DAPI.  
174 Zeiss Axioscan was used to image DAPI, Alexa 488, Atto-550, and Alexa 647 at 20X  
175 magnification.

#### 176 Immunostaining and histology

177 To visualize c-Fos protein in combination with AAV-hM4Di, perfused tissue was sliced  
178 on a freezing microtome at 30  $\mu$ m, and every third section throughout the PeFA was stained.  
179 Sections were rinsed with 0.1% PBS with Triton (PBST), blocked with 5% donkey serum diluted  
180 in PBST (blocking solution) for 1 hour at room temperature. Primary antibody chicken anti-  
181 mCherry (Millipore AB3566481) and rabbit anti c-Fos (Cell Signaling 2250S) were diluted at  
182 1:1000 in blocking solution and sections were incubated overnight at 4°C. After rinsing with  
183 PBST, secondary anti-chicken-A594 (Sigma CF594) and anti-rabbit-A647 (Life Technologies  
184 A31573) were applied at 1:200 and 1:1000 dilutions, respectively, in blocking solution and  
185 incubated overnight at 4°C. Sections were rinsed in PBS, mounted to Superfrost Plus slides,  
186 coverslipped with Prolong Gold containing DAPI, and imaged on the Zeiss Axioscan as  
187 described previously.



188 Chemogenetics

189 Ucn3::Cre virgin female mice (or Cre negative littermates as controls) 8-20 weeks old were  
190 used for these experiments. We stereotaxically injected ~225 nL of conditional inhibitory  
191 designer receptor exclusively activated by designer drug (DREADD) virus bilaterally into the  
192 PeFA<sub>+</sub> (AP -0.6mm,  $\pm$ ML 0.3mm, DV -4.2mm). For the naïve virgin female DREADD  
193 experiment, we used a custom prep from UNC Vector Core (AAV1-hSyn-DIO-HM4D(Gi)-  
194 mCherry; Chapel Hill, North Carolina, USA) and for the stressed virgin female DREADD  
195 experiment we used a custom prep from Vector Builder (AAV1-hSyn-FLEX-HM4D(Gi)-mCherry;  
196 Chicago, Illinois, USA). Animals used for stress study recovered from surgery for 1 week before  
197 the start of restraint and around two-three weeks before behavioral testing.

198 Cre-positive and Cre-negative females were administered intraperitoneally (i.p) with  
199 either 1x PBS (vehicle) or 0.3mg/kg clozapine-n-oxide (CNO) dissolved in 1x PBS and  
200 habituated to the testing environment for two-three hours prior to pup assay. Females were  
201 presented one to two C57BL6/J pups in the corner of their home-cage opposite the nest and  
202 parental behaviors were recorded for 10-15 minutes.

203 Four control animals used in the stress study were administered either CNO or saline i.p  
204 and 2 hours later were exposed to a pup. Animals were then perfused 90 minutes later to stain  
205 for c-Fos protein expression. (See Immunostaining and histology)

206 Data analysis and Statistics

207 Data was analyzed by Graphpad Prism 9.0 or Matlab scripts. For colocalization  
208 experiments, we used Fisher's exact test to compare the total number of fos+/marker+ positive  
209 cells to the total number of fos-/marker+ positive cell populations across all mice and expressed  
210 the data as percentages from each individual mouse. Pup retrieval percentages are analyzed  
211 by Kolmogorov-Smirnoff (2 groups) or Friedman test (3 groups). For experiments comparing  
212 one manipulation to control (i.e., stress or neuronal inactivation), we used t-test for parameters  
213 with normally distributed data and Mann-Whitney test for non-normally distributed data. To

214 compare one manipulation and control across several sessions, we used one-way repeated  
215 measures ANOVA tests followed by post-hoc correction. In experiments with comparison of two  
216 manipulations in several sessions (stress and neuronal inactivation), we used two-way repeated  
217 measures ANOVA followed by post-hoc correction. P values reported as follows: <0.05 \*, \*\*  
218 P<0.01, \*\*\* P<0.001, \*\*\*\* P<0.0001. All data are expressed as mean  $\pm$  SEM.

### 219 Image analysis

220 Images were exported from Zen Blue software and cells were manually counted for  
221 colocalization using FIJI Cell Counter. Graphpad Prism 9 was used to plot graphs and perform  
222 statistics.

### 223 Fiber Photometry

224 Ucn3-cre animals were injected with a cocktail of 150 nL of AAV-syn-jGCaMP7f-WPRE  
225 (Addgene 104488-AAV9) and 225 nL of AAV-hSyn-DIO-hM4D(Gi)-mCherry into PeFA (ML:  
226 0.3mm; AP -0.6mm; DV 4.2mm). In the same surgery, a 200 $\mu$ M fiber optic cannula was  
227 implanted (ML: 0.3mm; AP -0.6mm; DV 4.2mm). Animals recovered for at least 3 weeks before  
228 behavioral experiments. Animals were brought up to the test room in dim red light and injected  
229 with either vehicle (session 1) or 0.3mg/kg CNO (session 2) i.p. Two hours later, a fiber optic  
230 patch cable (Doric) was attached to the cannula and adjusted to attachment for 10 minutes  
231 before recording. Using a multi-channel fiber photometry system (Neurophotometrics LTD), a  
232 470 nm LED and 415 nm LED (isosbestic control) alternatively illuminated at 60 $\mu$ W via a 20X  
233 objective and fluorescence emission was collected using a CMOS camera sensor. After 1-2  
234 minutes of recording, animals underwent 6 tail suspensions for approximately 5 seconds per  
235 suspension. Data were acquired using the open-source software Bonsai.

236 Photometry data was analyzed using custom MATLAB code. To correct for  
237 photobleaching and motion artifact, we used normalization similarly described by Hrvatin et al  
238 2020 (Hrvatin *et al.*, 2020). In short, the isosbestic signal was fit with a biexponential and then  
239 linearly scaled to fit signal emitted by GCaMP. GCaMP signal was then divided by the scaled fit

240 for  $\Delta F/F$ . Tail suspension events were aligned to normalized photometric signal and peri-events  
241 were taken from 5 sec before tail suspension (“pre”) to 5 sec after (“post”). The pre-event  
242 baseline was used to calculate the z score  $\frac{\chi_i - \chi_{baseline}}{S_{baseline}}$ . The mean  $\Delta F/F$  of each pre- and post- tail  
243 suspension event was taken and averaged across animals per group (vehicle vs CNO) and  
244 compared using a paired t test. Area under curve was calculated with the mean  $\Delta F/F$  of each  
245 pre- and post- tail suspension event using the MATLAB built-in function “trapz”. Standard error  
246 mean is plotted with the average z-score.

#### 247 Code availability

248 Custom Matlab code for ethogram generation and analysis of photometry data is  
249 available upon request.

250

## 251 **Results**

252 To identify the activation levels of Urocortin-3 in the rostral perifornical area of the  
253 hypothalamus, we exposed C57 virgin females as well as lactating females (postpartum day 2)  
254 to either a foreign pup (P0-P4) or ~25 mg of fresh bedding (control) in their home cage. Animals  
255 were subsequently sacrificed 30 minutes after exposure (Figure 1A). To control for number of  
256 pups as well and foreign pup discrimination (Ostermeyer & Elwood, 1983; Mogi *et al.*, 2017), we  
257 utilized two groups of lactating females that either had their litter removed 10 minutes prior to  
258 foreign pup introduction or kept their litter (Figure 1A). Visualization of immediate early gene Fos  
259 and Ucn3 in PeFA revealed increases in PeFA<sup>Ucn3</sup> cell activation in virgin females exposed to a  
260 pup compared to controls (Figure 1B, C; Supplemental Figure 1-1). However, in lactating  
261 females, Fos levels in PeFA<sup>Ucn3</sup> decrease with pup exposure if litter has been removed but  
262 increase if litter is present. These results suggest that PeFA<sup>Ucn3</sup> cells respond to pup exposure  
263 similarly in virgin females and lactating females that keep their litter, while we observe opposite  
264 impact on PeFA<sup>Ucn3</sup> cell activity in mothers when her litter is removed.

265           Because virgin females are not as parental as lactating females (Lonstein & De Vries,  
266   2000; Kuroda *et al.*, 2011; Marlin *et al.*, 2015; Carcea *et al.*, 2021) and PeFA<sup>Ucn3</sup> neurons are  
267   activated by infanticide in females (Autry *et al.*, 2021), we wanted to test if suppression of  
268   PeFA<sup>Ucn3</sup> neuronal activity could enhance alloparental behavior in virgin females. To  
269   accomplish this, we used a conditional viral strategy to express the inhibitory designer receptor  
270   exclusively activated by designer drug (DREADD hm4Di) in Ucn3::Cre positive and Cre  
271   negative animals in the PeFA of virgin females naïve to pups. Two-three weeks after viral  
272   injection, both groups of animals were administered CNO (0.3 mg/kg intraperitoneally) and 2-3  
273   hours later, exposed to two pups for fifteen minutes in their home cage (Figure 2A;  
274   Supplemental Figure 2-1). We confirmed viral recombination to include females in subsequent  
275   behavioral analyses (Figure 2B). Cre+ females retrieved more pups in a shorter amount of time  
276   relative to Cre- females (Figure 2C & D). However, there was no difference in latency to retrieve  
277   the 2<sup>nd</sup> pup (Figure 2F). Furthermore, Cre+ animals spent more time in the nest with pups and  
278   started nest-building earlier compared to Cre- females (Figure 2K & N). While other behaviors  
279   were not improved (Figure 2 G-J, L, M, O-P), suppression of PeFA<sup>Ucn3</sup> neurons improved certain  
280   aspects of alloparenting behavior (Figure 2Q), particularly pup retrieval and time spent in the  
281   nest with the pups.

282           To understand the impact of chronic stress on alloparental behavior in virgin females, we  
283   employed a chronic restraint stress paradigm in which females were placed into a 50 mL Falcon  
284   conical tube for 1 hour a day for 20 days (Figure 3A). Stressed females weighed significantly  
285   less than control females (Figure 3B). On day 19, females were tested for exploratory behavior  
286   in a 5-minute open field task (Figure 3C-F). Stressed females spent less time in the center of  
287   the field compared to control females (Figure 3C). On the last day of stress, day 20, females  
288   were exposed to a newborn pup (P0-4) for 15 minutes and their alloparental behavior was  
289   recorded and analyzed (Figure 3G-R). Only 2 out of 9, or 22%, of stressed females retrieved  
290   pups compared to control females (5 of 9, or 55% retrieved) (Figure 3G). Other than retrieval

291 latency, virgin stressed females did not show any significant changes in other measures of  
292 alloparental behavior. Altogether, we find that chronic restraint stress significantly reduces pup  
293 retrieval in virgin females.

294         Next, to understand the impact of chronic stress on maternal behavior in lactating  
295 females, we utilized the same chronic restraint paradigm in females from postpartum day 2-18  
296 (Figure 4A), before weaning age for pups. Like stressed virgin females, stressed lactating  
297 females weighed significantly less than control females (Figure 4B), indicating that chronic  
298 restraint induced physiological changes. On day 16 of chronic restraint, females were tested for  
299 anxiety-related behavior in a 5-minute open field task (Figure 4C-F). Surprisingly, stressed  
300 females spent more time in the center of the field and less time in the borders (Figure 4C, D).  
301 Stressed females also showed an increase in velocity and distance traveled relative to control  
302 females (Figure 4E, F). On the last day of stress, day 17, females had their litters removed and  
303 10 minutes later we introduced a foreign-born pup to their home cage (Figure 4G-R). All females  
304 retrieved pups before the end of the 10 minutes session (Figure 4G, H) and there was no  
305 difference in latency to retrieve between groups. Stressed mothers showed similar levels of  
306 parenting toward pups as control mothers. We also attempted to use an intruder stress  
307 paradigm that has previously been reported to impact parental behavior in lactating females  
308 (Carini *et al.*, 2013; Murgatroyd *et al.*, 2016). We did not see any weight changes or parenting  
309 measures (Supplemental Figure 4-1).

310         Next, we investigated molecular and physiological impacts of chronic restraint stress in  
311 virgin or lactating females. In situ hybridization revealed increases in PeFA<sup>Ucn3</sup>/Fos  
312 colocalization in stressed virgin females (Figure 5A, B; Supplemental Figure 5-1). In control  
313 virgin females, percentage of PeFA<sup>Ucn3</sup>/Fos colocalization was negatively correlated with time  
314 spent parenting, indicating that activation of PeFA<sup>Ucn3</sup> may reduce alloparental behaviors (Figure  
315 5E). Because activation of corticotropin releasing factor (CRF) cells in the paraventricular  
316 hypothalamus (PVH) is postulated to disrupt maternal behavior and is critical for physiological

317 stress responses (Herman & Tasker, 2016; Klampfl & Bosch, 2019), we also quantified  
318 PVH<sup>CRF</sup>/Fos colocalization (Figure 5C,F). We found that PVH<sup>CRH</sup>/Fos levels were significantly  
319 reduced in both stressed virgin females and lactating females, and like PeFA<sup>Ucn3</sup>, PVH<sup>CRF</sup>  
320 neuronal activation is negatively correlated with parental behaviors (Figure 5F). Chronic  
321 restraint stress did not affect circulating CORT levels in virgin females (Figure 5D). In mothers,  
322 chronic stress led to a decrease in PeFA<sup>Ucn3</sup>/Fos levels compared to control lactating females,  
323 opposite to the effect we observed in virgin females (Figure 5G, H). Like virgin females,  
324 however, PVH<sup>CRF</sup> cell activation was significantly decreased in chronically stressed lactating  
325 females (Figure 5G, I; Supplemental Figure 5-1), consistent with previous literature (Girotti *et*  
326 *al.*, 2006; Radley & Sawchenko, 2015; Matovic *et al.*, 2020). We observed a similar negative  
327 trend for correlation of PeFA<sup>Ucn3</sup> neuronal activation and parental behaviors in control lactating  
328 females that we observed in virgin females, but the trend for PVH<sup>CRF</sup> cell activation is positively  
329 correlated in lactating females (Figure 5 K, L). We observed that CORT levels were significantly  
330 decreased in stressed lactating females (Figure 5J), suggesting adaptive habituation to the  
331 repeated stress. In our intruder stress experiment, we did not observe molecular changes in  
332 PeFA<sup>Ucn3</sup> activation or in circulating corticosterone levels, consistent with no changes in weight  
333 or parental behavior (Supplemental Figure 5-2). Altogether, chronic restraint stress induces  
334 differential PeFA<sup>Ucn3</sup> activation patterns in virgin and lactating females in response to pups,  
335 while chronic stress reduces PVH<sup>CRF</sup> neuronal activation in both virgins and mothers.

336         Because our chronic restraint stress paradigm dampened alloparental behavior in virgin  
337 females and increased PeFA<sup>Ucn3</sup> neuronal activation, we sought to ameliorate deficits in  
338 parenting by inhibiting PeFA<sup>Ucn3</sup> neurons during pup exposure. To accomplish this, we injected  
339 virgin Ucn3::Cre positive and negative females with AAV1-eF1a-DIO-hM4Di-mCherry and then  
340 started restraint stress 1 week after recovery from surgery. After 16 days of chronic restraint  
341 stress, we injected either vehicle or CNO on 2 consecutive days after the last day of stress.  
342 After several days we then employed randomized CNO/Vehicle open field trials. On day 32, we

343 performed an additional pup exposure with vehicle treatment (Figure 6A). Stressed females had  
344 a significant difference in weight compared to control females (Figure 6B). During open field,  
345 CNO administration did not induce changes in exploratory behaviors in either group (Figure 6C-  
346 F). In the pup exposure assay, both stressed and control virgin females had improved  
347 cumulative retrieval with CNO treatment, which we did not observe in the Cre negative group  
348 (Figure 6 G, H; Supplemental Figure 6-1). Strikingly, stressed females treated with CNO  
349 displayed improved latency to retrieve, time spent crouching, time spent in nest and overall time  
350 spent parenting which did not occur in unstressed controls or Cre negative controls, or in the  
351 final vehicle session (Figure 6I, L, M, N; Supplemental Figure 6-1). No significant changes were  
352 observed in pup grooming (Figure 6K). Interestingly, pup investigation was significantly  
353 decreased in both groups which may be due to increased familiarity (Figure 6J) (Bielsky *et al.*,  
354 2005; Richter *et al.*, 2005; Moy *et al.*, 2008). CNO administration did not improve any of the  
355 parenting measures in stressed Cre negative females (Supplemental Figure 6-1). We  
356 confirmed that CNO administration reduced activity in the PeFA<sup>Ucn3</sup> neurons using both  
357 histology and fiber photometry recording (Supplemental Figure 6-2). Altogether, inhibition of  
358 PeFA<sup>Ucn3</sup> neuronal activity leads to enhancement in parenting behaviors in stressed virgin  
359 females (Figure 6O, P).

360

## 361 **Discussion**

362 Previously, we have observed that virgin females showing alloparental behavior toward  
363 pups have a low-level of activation of PeFA<sup>Ucn3</sup> neurons while activating these cells highly with  
364 chemogenetic or optogenetic methods leads to infant-directed neglect and aggression toward  
365 pups (Autry *et al.*, 2021). In the present study, we further explored the role of urocortin-3  
366 neurons of the perifornical area during female alloparental and maternal behavior. We aimed to  
367 examine the intersection between the role of these neurons in infant-directed behavior and their  
368 putative role in the hypothalamic-pituitary-adrenal axis. We hypothesized that PeFA<sup>Ucn3</sup> neurons

369 become more active with stress and increased PeFA<sup>Ucn3</sup> cell activity would lead to deficits in  
370 pup-directed behavior. Therefore, we studied activation levels of PeFA<sup>Ucn3</sup> neurons in virgin  
371 females and mothers exposed to pups with and without stress and studied the effect of  
372 PeFA<sup>Ucn3</sup> neuron inhibition on alloparental behavior under non-stressed and stressed  
373 conditions.

374 We find that around 20% of PeFA<sup>Ucn3</sup> neurons are active during infant-directed behavior  
375 in virgin females, replicating our previous findings (Autry *et al.*, 2021). In addition, we replicated  
376 our finding that mothers have a lower level of PeFA<sup>Ucn3</sup> neuronal activation during pup exposure  
377 compared to virgin females. However, we noticed that the controls for our mother group, in  
378 which we typically remove the litter, had a high baseline of PeFA<sup>Ucn3</sup> neuron activity compared  
379 to virgin females exposed to bedding. We therefore added a group of mothers who did not have  
380 their litters removed. This experiment revealed that our control bedding exposure and  
381 experimental pup exposure conditions impact PeFA<sup>Ucn3</sup> neural activity differentially in mothers  
382 depending on whether the mother's litter is present. These results indicate that PeFA<sup>Ucn3</sup>  
383 neurons may be sensitive to social contexts; these neurons appear to have high baseline  
384 activity in mothers with their litters removed during a control bedding exposure and this activity  
385 level plummets with introduction of foreign pups. In the future, it will be important to tease apart  
386 whether this heightened PeFA<sup>Ucn3</sup> neural activity after litter removal may be related to an  
387 aversive or stressed state, or possibly a social motivation set point that is altered after a female  
388 gives birth. Indeed, previous studies have shown that maternal separation can impact both a  
389 mother and their offspring's behavior in measures related to anxiety, social behavior, and  
390 cognition (Lemaire *et al.*, 2000; Weinstock, 2001; Chapillon *et al.*, 2002).

391 We next assessed the impact of inhibiting this low-level of activity during infant-directed  
392 behavior. We found that there was a subtle but significant effect of inhibition PeFA<sup>Ucn3</sup> neurons  
393 on pup-retrieval latency in virgin females. We previously observed that activation of the  
394 excitatory PeFA<sup>Ucn3</sup> neuron projections to the ventromedial hypothalamus or lateral septum



395 mediate infant avoidance and neglect. Our current results suggest that inhibition of PeFA<sup>Ucn3</sup>  
396 neurons in virgin females may lead to decreased activity in these target areas responsible for  
397 negative pup directed behavior, allowing for faster infant retrieval. While the behavioral impact  
398 of this manipulation is relatively minor, it is in line with the low-level of activation we observe at  
399 the cellular level.

400 In a parallel set of experiments, we tested the impact of chronic stress on infant-directed  
401 behavior and PeFA<sup>Ucn3</sup> neuronal activity in virgin females and mothers. We started by testing a  
402 chronic restraint stress paradigm in virgin females. With this paradigm, we observed significant  
403 weight loss in females exposed to daily restraint compared to unstressed females. Prior to  
404 testing infant-directed behavior, we tested open-field behavior to ensure that the stress  
405 paradigm had a behavioral impact after two weeks of chronic restraint, and indeed we observed  
406 a reduction in exploration time of the center of the arena in stressed females. Thus, we  
407 continued with the infant-directed behavior assay and observed that females with chronic  
408 restraint showed significantly less pup retrieval compared to unstressed females, with 2 out of 9  
409 stressed females displaying infant-directed aggression behavior. When we examined the  
410 physiological effects of stress, we found that circulating CORT levels were not impacted though  
411 PVH<sup>CRF</sup> neuron activation was significantly reduced in females subjected to stress, suggestive  
412 of HPA axis habituation to the repeated stress. However, we did find enhanced PeFA<sup>Ucn3</sup>  
413 neuron activity in chronically stressed females. Intriguingly, we found a strong negative  
414 correlation between PeFA<sup>Ucn3</sup> neuronal activity levels and overall alloparenting behavior in  
415 unstressed females, and this correlation was lost in stressed females. Together, these data  
416 support our hypothesis that stress increases activity of PeFA<sup>Ucn3</sup> neurons, and heightened  
417 activity in PeFA<sup>Ucn3</sup> neurons negatively impacts infant-directed behavior.

418 We therefore proceeded with the chronic restraint paradigm in lactating females. We  
419 used a similar timeline for testing, with daily weighing and an open field test prior to pup  
420 exposure. We observed significant weight loss in lactating females exposed to stress, however

421 our open field test revealed that females with chronic restraint stress displayed increased  
422 exploration of the center of the open field relative to control females. This behavior may be a  
423 sign of hypervigilance and may be explained by an increase in distance traveled as well as  
424 velocity (Cabib *et al.*, 1988; Sequeira-Cordero *et al.*, 2019; Rudolph *et al.*, 2020). In our  
425 subsequent infant-directed behavior assessment, we found no differences in maternal behavior  
426 between unstressed and chronically restrained mothers. In our physiological measures, we  
427 observed that CORT levels were decreased in mothers with chronic restraint stress with a  
428 decrease in both CRF and Ucn3 neuronal activation. The decrease in CORT and CRF neuronal  
429 activation are indicative of HPA axis habituation to the repeated stress. Indeed, previous  
430 studies have illustrated a reduction in CRF/Fos colabeling or electrophysiological properties of  
431 CRF neurons in the PVH with repeated restraint stress in rodents (Bonaz & Rivest, 1998;  
432 Matovic *et al.*, 2020). We interpret the decrease in Ucn3 neuronal activity as a protective  
433 mechanism, preserving maternal behavior under stressful conditions. Indeed, previous studies  
434 show that lactating mothers display changes in HPA axis responsivity to stress (Johnstone *et*  
435 *al.*, 2000; Douglas *et al.*, 2003; Klampfl & Bosch, 2019), and reduction in PeFA<sup>Ucn3</sup> neuronal  
436 activity may contribute to behavioral adaptations to stress.

437 To overcome the habituation to repeated restraint we observed in mothers, we  
438 attempted to perform chronic social stress in lactating females (Supplemental Figure 4-1).  
439 However, the stress did not result in weight changes or impact maternal behavior. In the future,  
440 we hope to identify a stress paradigm for lactating females that impacts maternal behavior.  
441 Furthermore, we aim to study the role of PeFA<sup>Ucn3</sup> neurons in HPA axis hypo-responsivity in  
442 mothers to uncover their potential role in maternal behavior preservation.

443 We plotted female infant-directed behaviors as ethograms to gain broader insight into  
444 how stress affects this complex interaction. Surprisingly, we found that virgin females display  
445 longer bouts of infant-directed behaviors during the pup exposure assay relative to mothers,  
446 whose behavioral motifs appear to be more sporadic from one behavior to the next (Zoubovsky

447 *et al.*, 2020). We suspect that this difference is at least in part due to the removal of the litter  
448 during habituation for mothers that is not required for testing virgin females. However, this  
449 result does imply that, at least in terms of studying the neural architecture of infant-directed  
450 behavior, (1) we can collect a rich dataset from virgin females and (2) that we must be diligent in  
451 considering the conditions under which we test behavior in mothers in the laboratory given that  
452 litter removal may have a significant impact on some experimental parameters (Lonstein, 2005;  
453 Smith & Lonstein, 2008; Miller *et al.*, 2011).

454 Finally, we tested if we could rescue stress-induced deficits in alloparental behavior by  
455 inhibiting PeFA<sup>Ucn3</sup> neurons. We confirmed that our chronic restraint stress paradigm led to  
456 weight reductions and proceeded with our pup exposure assay. We found that chemogenetic  
457 inhibition of PeFA<sup>Ucn3</sup> neurons did lead to improved alloparental behavior on several measures  
458 including latency to retrieve, time in nest, and crouching. We designed the experiment to  
459 observe the effect of stress alone on the first day with vehicle administration followed by  
460 inhibition of PeFA<sup>Ucn3</sup> neurons by CNO treatment on the second day, with a final vehicle test  
461 after drug washout. We settled on this design based on our previous observation that blocking  
462 PeFA<sup>Ucn3</sup> neuronal activity optogenetically led to prolonged improvement of infant-directed  
463 behavior. We included two control groups, the nonstressed Cre positive group, and the  
464 stressed Cre negative group to control for the effects of repeated testing. Our data illustrate that  
465 inhibiting PeFA<sup>Ucn3</sup> neurons in stressed females leads to more substantial effects on alloparental  
466 behavior compared to either control group.

467 Overall, we find that PeFA<sup>Ucn3</sup> neuronal activity is higher in females showing lower levels  
468 of positive infant-directed behavior, a trend that can be observed regardless of physiological  
469 status. Chronic stress leads to reduced alloparental behavior accompanied by higher numbers  
470 of active PeFA<sup>Ucn3</sup> neurons in virgin females. Blocking activity in PeFA<sup>Ucn3</sup> neurons rescues  
471 infant-directed behavioral deficits in virgin females. Together with previous studies, our results  
472 suggest the important role for the level of PeFA<sup>Ucn3</sup> neuronal activity in the expression of pro-

473 and anti-parental behavior (Supplemental Figure 6-3). These results support the critical role for  
474 PeFA<sup>Ucn3</sup> neurons in the neural circuitry controlling female parental behaviors and the sensitivity  
475 of these behaviors to stress.

476

#### 477 **Author Contributions**

478 B.A. and A.E.A. designed and performed experiments, analyzed, and plotted data, and  
479 interpreted data and wrote the paper. R.A. supported animal experiments and analyzed data.  
480 I.C. analyzed and plotted data.

481

#### 482 **Acknowledgements and funding**

483 A.E.A. was supported by a NARSAD Young Investigator Award and a Pathway to  
484 Independence Award (NIH R00HD085188). B.A. was supported by a diversity supplement to  
485 A.E.A.'s NIH award (R00HD085188-S1) and a Tishman Scholarship. We thank Catherine  
486 Dulac for intellectual input and project support at Harvard University. We thank Stacey Sullivan  
487 for assistance with transfer of data and mice from Harvard University to Albert Einstein College  
488 of Medicine. We thank Krysten Garcia for histology assistance. We thank Giovanni Podda for  
489 guidance on the photometry analysis. We thank Kostantin Dobrenis, Vladimir Mudragel, and  
490 Mariah Marrero for guidance on Axioscan usage. We thank Kevin Fisher for assistance with  
491 image export and analysis. We thank all the members of the Autry lab for input on manuscript  
492 preparation.

493

494 **References**

- 495 Autry, A.E., Adachi, M., Cheng, P. & Monteggia, L.M. (2009) Gender-specific impact of brain-  
496 derived neurotrophic factor signaling on stress-induced depression-like behavior. *Biol*  
497 *Psychiatry*, **66**, 84-90.
- 498  
499 Autry, A.E., Wu, Z., Kapoor, V., Kohl, J., Bambah-Mukku, D., Rubinstein, N.D., Marin-  
500 Rodriguez, B., Carta, I., Sedwick, V., Tang, M. & Dulac, C. (2021) Urocortin-3 neurons in  
501 the mouse perifornical area promote infant-directed neglect and aggression. *Elife*, **10**.
- 502  
503 Bielsky, I.F., Hu, S.B., Ren, X., Terwilliger, E.F. & Young, L.J. (2005) The V1a vasopressin  
504 receptor is necessary and sufficient for normal social recognition: a gene replacement  
505 study. *Neuron*, **47**, 503-513.
- 506  
507 Bonaz, B. & Rivest, S. (1998) Effect of a chronic stress on CRF neuronal activity and expression  
508 of its type 1 receptor in the rat brain. *Am J Physiol*, **275**, R1438-1449.
- 509  
510 Brunton, P.J., Russell, J.A. & Douglas, A.J. (2008) Adaptive responses of the maternal  
511 hypothalamic-pituitary-adrenal axis during pregnancy and lactation. *J Neuroendocrinol*,  
512 **20**, 764-776.
- 513  
514 Cabib, S., Kempf, E., Schlee, C., Mele, A. & Puglisi-Allegra, S. (1988) Different effects of acute  
515 and chronic stress on two dopamine-mediated behaviors in the mouse. *Physiol Behav*,  
516 **43**, 223-227.
- 517  
518 Cameron, N.M., Champagne, F.A., Parent, C., Fish, E.W., Ozaki-Kuroda, K. & Meaney, M.J.  
519 (2005) The programming of individual differences in defensive responses and  
520 reproductive strategies in the rat through variations in maternal care. *Neurosci Biobehav*  
521 *Rev*, **29**, 843-865.
- 522  
523 Carcea, I., Caraballo, N.L., Marlin, B.J., Ooyama, R., Riceberg, J.S., Mendoza Navarro, J.M.,  
524 Opendak, M., Diaz, V.E., Schuster, L., Alvarado Torres, M.I., Lethin, H., Ramos, D.,  
525 Minder, J., Mendoza, S.L., Bair-Marshall, C.J., Samadjopoulos, G.H., Hidema, S.,  
526 Falkner, A., Lin, D., Mar, A., Wadghiri, Y.Z., Nishimori, K., Kikusui, T., Mogi, K., Sullivan,  
527 R.M. & Froemke, R.C. (2021) Oxytocin neurons enable social transmission of maternal  
528 behaviour. *Nature*, **596**, 553-557.
- 529  
530 Carini, L.M., Murgatroyd, C.A. & Nephew, B.C. (2013) Using chronic social stress to model  
531 postpartum depression in lactating rodents. *J Vis Exp*, e50324.
- 532  
533 Chapillon, P., Patin, V., Roy, V., Vincent, A. & Caston, J. (2002) Effects of pre- and postnatal  
534 stimulation on developmental, emotional, and cognitive aspects in rodents: a review.  
535 *Dev Psychobiol*, **41**, 373-387.

- 536  
537 Chen, P.B., Hu, R.K., Wu, Y.E., Pan, L., Huang, S., Micevych, P.E. & Hong, W. (2019) Sexually  
538 Dimorphic Control of Parenting Behavior by the Medial Amygdala. *Cell*, **176**, 1206-1221  
539 e1218.
- 540  
541 Delpech, J.C., Wei, L., Hao, J., Yu, X., Madore, C., Butovsky, O. & Kaffman, A. (2016) Early life  
542 stress perturbs the maturation of microglia in the developing hippocampus. *Brain Behav*  
543 *Immun*, **57**, 79-93.
- 544  
545 Deussing, J.M., Breu, J., Kuhne, C., Kallnik, M., Bunck, M., Glasl, L., Yen, Y.C., Schmidt, M.V.,  
546 Zurmuhlen, R., Vogl, A.M., Gailus-Durner, V., Fuchs, H., Holter, S.M., Wotjak, C.T.,  
547 Landgraf, R., de Angelis, M.H., Holsboer, F. & Wurst, W. (2010) Urocortin 3 modulates  
548 social discrimination abilities via corticotropin-releasing hormone receptor type 2. *The*  
549 *Journal of neuroscience : the official journal of the Society for Neuroscience*, **30**, 9103-  
550 9116.
- 551  
552 Douglas, A.J., Brunton, P.J., Bosch, O.J., Russell, J.A. & Neumann, I.D. (2003) Neuroendocrine  
553 responses to stress in mice: hyporesponsiveness in pregnancy and parturition.  
554 *Endocrinology*, **144**, 5268-5276.
- 555  
556 Feifel, A.J., Shair, H.N. & Schmauss, C. (2017) Lasting effects of early life stress in mice:  
557 interaction of maternal environment and infant genes. *Genes Brain Behav*, **16**, 768-780.
- 558  
559 Fischer, E.K., Roland, A.B., Moskowitz, N.A., Tapia, E.E., Summers, K., Coloma, L.A. &  
560 O'Connell, L.A. (2019) The neural basis of tadpole transport in poison frogs. *Proc Biol*  
561 *Sci*, **286**, 20191084.
- 562  
563 Girotti, M., Pace, T.W., Gaylord, R.I., Rubin, B.A., Herman, J.P. & Spencer, R.L. (2006)  
564 Habituation to repeated restraint stress is associated with lack of stress-induced c-fos  
565 expression in primary sensory processing areas of the rat brain. *Neuroscience*, **138**,  
566 1067-1081.
- 567  
568 Herman, J.P. & Tasker, J.G. (2016) Paraventricular Hypothalamic Mechanisms of Chronic  
569 Stress Adaptation. *Front Endocrinol (Lausanne)*, **7**, 137.
- 570  
571 Hrvatin, S., Sun, S., Wilcox, O.F., Yao, H., Lavin-Peter, A.J., Cicconet, M., Assad, E.G., Palmer,  
572 M.E., Aronson, S., Banks, A.S., Griffith, E.C. & Greenberg, M.E. (2020) Neurons that  
573 regulate mouse torpor. *Nature*, **583**, 115-121.
- 574  
575 Jamieson, P.M., Li, C., Kukura, C., Vaughan, J. & Vale, W. (2006) Urocortin 3 modulates the  
576 neuroendocrine stress response and is regulated in rat amygdala and hypothalamus by  
577 stress and glucocorticoids. *Endocrinology*, **147**, 4578-4588.
- 578

- 579 Johnstone, H.A., Wigger, A., Douglas, A.J., Neumann, I.D., Landgraf, R., Seckl, J.R. & Russell,  
580 J.A. (2000) Attenuation of hypothalamic-pituitary-adrenal axis stress responses in late  
581 pregnancy: changes in feedforward and feedback mechanisms. *J Neuroendocrinol*, **12**,  
582 811-822.
- 583  
584 Klampfl, S.M. & Bosch, O.J. (2019) Mom doesn't care: When increased brain CRF system  
585 activity leads to maternal neglect in rodents. *Front Neuroendocrinol*, **53**, 100735.
- 586  
587 Kohl, J., Babayan, B.M., Rubinstein, N.D., Autry, A.E., Marin-Rodriguez, B., Kapoor, V.,  
588 Miyamishi, K., Zweifel, L.S., Luo, L., Uchida, N. & Dulac, C. (2018) Functional circuit  
589 architecture underlying parental behaviour. *Nature*, **556**, 326-331.
- 590  
591 Kronman, H., Torres-Berrio, A., Sidoli, S., Issler, O., Godino, A., Ramakrishnan, A., Mews, P.,  
592 Lardner, C.K., Parise, E.M., Walker, D.M., van der Zee, Y.Y., Browne, C.J., Boyce, B.F.,  
593 Neve, R., Garcia, B.A., Shen, L., Pena, C.J. & Nestler, E.J. (2021) Long-term behavioral  
594 and cell-type-specific molecular effects of early life stress are mediated by H3K79me2  
595 dynamics in medium spiny neurons. *Nat Neurosci*, **24**, 667-676.
- 596  
597 Kuperman, Y., Issler, O., Regev, L., Musseri, I., Navon, I., Neufeld-Cohen, A., Gil, S. & Chen, A.  
598 (2010) Perifornical Urocortin-3 mediates the link between stress-induced anxiety and  
599 energy homeostasis. *Proceedings of the National Academy of Sciences of the United*  
600 *States of America*, **107**, 8393-8398.
- 601  
602 Kuroda, K.O., Tachikawa, K., Yoshida, S., Tsuneoka, Y. & Numan, M. (2011) Neuromolecular  
603 basis of parental behavior in laboratory mice and rats: with special emphasis on  
604 technical issues of using mouse genetics. *Prog Neuropsychopharmacol Biol Psychiatry*,  
605 **35**, 1205-1231.
- 606  
607 Lemaire, V., Koehl, M., Le Moal, M. & Abrous, D.N. (2000) Prenatal stress produces learning  
608 deficits associated with an inhibition of neurogenesis in the hippocampus. *Proc Natl*  
609 *Acad Sci U S A*, **97**, 11032-11037.
- 610  
611 Lonstein, J.S. (2005) Reduced anxiety in postpartum rats requires recent physical interactions  
612 with pups, but is independent of suckling and peripheral sources of hormones. *Horm*  
613 *Behav*, **47**, 241-255.
- 614  
615 Lonstein, J.S. & De Vries, G.J. (2000) Sex differences in the parental behavior of rodents.  
616 *Neurosci Biobehav Rev*, **24**, 669-686.
- 617  
618 Marlin, B.J., Mitre, M., D'Amour, J. A., Chao, M.V. & Froemke, R.C. (2015) Oxytocin enables  
619 maternal behaviour by balancing cortical inhibition. *Nature*, **520**, 499-504.
- 620



- 621 Maruska, K.P., Butler, J.M., Field, K.E., Forester, C. & Augustus, A. (2020) Neural Activation  
622 Patterns Associated with Maternal Mouthbrooding and Energetic State in an African  
623 Cichlid Fish. *Neuroscience*, **446**, 199-212.
- 624  
625 Matovic, S., Ichiyama, A., Igarashi, H., Salter, E.W., Sunstrum, J.K., Wang, X.F., Henry, M.,  
626 Kuebler, E.S., Vernoux, N., Martinez-Trujillo, J., Tremblay, M.E. & Inoue, W. (2020)  
627 Neuronal hypertrophy dampens neuronal intrinsic excitability and stress responsiveness  
628 during chronic stress. *J Physiol*, **598**, 2757-2773.
- 629  
630 Medina, J., De Guzman, R.M. & Workman, J.L. (2021) Lactation is not required for maintaining  
631 maternal care and active coping responses in chronically stressed postpartum rats:  
632 Interactions between nursing demand and chronic variable stress. *Horm Behav*, **136**,  
633 105035.
- 634  
635 Miller, S.M., Piasecki, C.C. & Lonstein, J.S. (2011) Use of the light-dark box to compare the  
636 anxiety-related behavior of virgin and postpartum female rats. *Pharmacol Biochem*  
637 *Behav*, **100**, 130-137.
- 638  
639 Mogi, K., Takakuda, A., Tsukamoto, C., Ooyama, R., Okabe, S., Koshida, N., Nagasawa, M. &  
640 Kikusui, T. (2017) Mutual mother-infant recognition in mice: The role of pup ultrasonic  
641 vocalizations. *Behav Brain Res*, **325**, 138-146.
- 642  
643 Moy, S.S., Nadler, J.J., Young, N.B., Nonneman, R.J., Segall, S.K., Andrade, G.M., Crawley,  
644 J.N. & Magnuson, T.R. (2008) Social approach and repetitive behavior in eleven inbred  
645 mouse strains. *Behav Brain Res*, **191**, 118-129.
- 646  
647 Murgatroyd, C.A., Hicks-Nelson, A., Fink, A., Beamer, G., Gurel, K., Elnady, F., Pittet, F. &  
648 Nephew, B.C. (2016) Effects of Chronic Social Stress and Maternal Intranasal Oxytocin  
649 and Vasopressin on Offspring Interferon-gamma and Behavior. *Front Endocrinol*  
650 *(Lausanne)*, **7**, 155.
- 651  
652 Murgatroyd, C.A. & Nephew, B.C. (2013) Effects of early life social stress on maternal behavior  
653 and neuroendocrinology. *Psychoneuroendocrinology*, **38**, 219-228.
- 654  
655 Murgatroyd, C.A., Pena, C.J., Podda, G., Nestler, E.J. & Nephew, B.C. (2015) Early life social  
656 stress induced changes in depression and anxiety associated neural pathways which  
657 are correlated with impaired maternal care. *Neuropeptides*, **52**, 103-111.
- 658  
659 Nephew, B.C. & Bridges, R.S. (2011) Effects of chronic social stress during lactation on  
660 maternal behavior and growth in rats. *Stress*, **14**, 677-684.
- 661  
662 Neufeld-Cohen, A., Kelly, P.A., Paul, E.D., Carter, R.N., Skinner, E., Olverman, H.J., Vaughan,  
663 J.M., Issler, O., Kuperman, Y., Lowry, C.A., Vale, W.W., Seckl, J.R., Chen, A. &



- 664 Jamieson, P.M. (2012) Chronic activation of corticotropin-releasing factor type 2  
665 receptors reveals a key role for 5-HT1A receptor responsiveness in mediating behavioral  
666 and serotonergic responses to stressful challenge. *Biological psychiatry*, **72**, 437-447.
- 667  
668 Numan, M. (1974) Medial preoptic area and maternal behavior in the female rat. *J Comp*  
669 *Physiol Psychol*, **87**, 746-759.
- 670  
671 Numan, M. (2020) *The parental brain : mechanisms, development, and evolution*. Oxford  
672 University Press, New York.
- 673  
674 Numan, M. & Insel, T.R. (2003) *The neurobiology of parental behavior*. Springer-Verlag, New  
675 York.
- 676  
677 O'Connell, L.A., Matthews, B.J. & Hofmann, H.A. (2012) Isotocin regulates paternal care in a  
678 monogamous cichlid fish. *Horm Behav*, **61**, 725-733.
- 679  
680 Ostermeyer, M.C. & Elwood, R.W. (1983) Pup recognition in *Mus musculus*: parental  
681 discrimination between their own and alien young. *Dev Psychobiol*, **16**, 75-82.
- 682  
683 Paulson, J.F. & Bazemore, S.D. (2010) Prenatal and postpartum depression in fathers and its  
684 association with maternal depression: a meta-analysis. *JAMA*, **303**, 1961-1969.
- 685  
686 Radley, J.J. & Sawchenko, P.E. (2015) Evidence for involvement of a limbic paraventricular  
687 hypothalamic inhibitory network in hypothalamic-pituitary-adrenal axis adaptations to  
688 repeated stress. *J Comp Neurol*, **523**, 2769-2787.
- 689  
690 Richter, K., Wolf, G. & Engelmann, M. (2005) Social recognition memory requires two stages of  
691 protein synthesis in mice. *Learn Mem*, **12**, 407-413.
- 692  
693 Rincon-Cortes, M. & Grace, A.A. (2021) Postpartum scarcity-adversity disrupts maternal  
694 behavior and induces a hypodopaminergic state in the rat dam and adult female  
695 offspring. *Neuropsychopharmacology*.
- 696  
697 Rosinger, Z.J., Mayer, H.S., Geyfen, J.I., Orser, M.K. & Stolzenberg, D.S. (2021) Ethologically  
698 relevant repeated acute social stress induces maternal neglect in the lactating female  
699 mouse. *Dev Psychobiol*, **63**, e22173.
- 700  
701 Rudolph, S., Guo, C., Pashkovski, S.L., Osorno, T., Gillis, W.F., Krauss, J.M., Nyitrai, H.,  
702 Flaquer, I., El-Rifai, M., Datta, S.R. & Regehr, W.G. (2020) Cerebellum-Specific Deletion  
703 of the GABAA Receptor delta Subunit Leads to Sex-Specific Disruption of Behavior. *Cell*  
704 *Rep*, **33**, 108338.

- 705  
706 Sato, K., Hamasaki, Y., Fukui, K., Ito, K., Miyamichi, K., Minami, M. & Amano, T. (2020)  
707 Amygdalohippocampal Area Neurons That Project to the Preoptic Area Mediate Infant-  
708 Directed Attack in Male Mice. *J Neurosci*, **40**, 3981-3994.
- 709  
710 Sequeira-Cordero, A., Salas-Bastos, A., Fornaguera, J. & Brenes, J.C. (2019) Behavioural  
711 characterisation of chronic unpredictable stress based on ethologically relevant  
712 paradigms in rats. *Sci Rep*, **9**, 17403.
- 713  
714 Singh-Taylor, A., Korosi, A., Molet, J., Gunn, B.G. & Baram, T.Z. (2015) Synaptic rewiring of  
715 stress-sensitive neurons by early-life experience: a mechanism for resilience? *Neurobiol*  
716 *Stress*, **1**, 109-115.
- 717  
718 Slawski, B.A. & Buntin, J.D. (1995) Preoptic area lesions disrupt prolactin-induced parental  
719 feeding behavior in ring doves. *Horm Behav*, **29**, 248-266.
- 720  
721 Smith, C.D. & Lonstein, J.S. (2008) Contact with infants modulates anxiety-generated c-fos  
722 activity in the brains of postpartum rats. *Behavioural brain research*, **190**, 193-200.
- 723  
724 Tsuneoka, Y., Tokita, K., Yoshihara, C., Amano, T., Esposito, G., Huang, A.J., Yu, L.M., Odaka,  
725 Y., Shinozuka, K., McHugh, T.J. & Kuroda, K.O. (2015) Distinct preoptic-BST nuclei  
726 dissociate paternal and infanticidal behavior in mice. *EMBO J*, **34**, 2652-2670.
- 727  
728 Walker, C.D., Tilders, F.J. & Burlet, A. (2001) Increased colocalization of corticotropin-releasing  
729 factor and arginine vasopressin in paraventricular neurones of the hypothalamus in  
730 lactating rats: evidence from immunotargeted lesions and immunohistochemistry. *J*  
731 *Neuroendocrinol*, **13**, 74-85.
- 732  
733 Wang, X.D., Rammes, G., Kraev, I., Wolf, M., Liebl, C., Scharf, S.H., Rice, C.J., Wurst, W.,  
734 Holsboer, F., Deussing, J.M., Baram, T.Z., Stewart, M.G., Muller, M.B. & Schmidt, M.V.  
735 (2011) Forebrain CRF(1) modulates early-life stress-programmed cognitive deficits. *J*  
736 *Neurosci*, **31**, 13625-13634.
- 737  
738 Weinstock, M. (2001) Alterations induced by gestational stress in brain morphology and  
739 behaviour of the offspring. *Prog Neurobiol*, **65**, 427-451.
- 740  
741 Wisner, K.L., Sit, D.K., McShea, M.C., Rizzo, D.M., Zoretich, R.A., Hughes, C.L., Eng, H.F.,  
742 Luther, J.F., Wisniewski, S.R., Costantino, M.L., Confer, A.L., Moses-Kolko, E.L., Famy,  
743 C.S. & Hanusa, B.H. (2013) Onset timing, thoughts of self-harm, and diagnoses in  
744 postpartum women with screen-positive depression findings. *JAMA Psychiatry*, **70**, 490-  
745 498.
- 746

- 747 Wu, Z., Autry, A.E., Bergan, J.F., Watabe-Uchida, M. & Dulac, C.G. (2014) Galanin neurons in  
748 the medial preoptic area govern parental behaviour. *Nature*, **509**, 325-330.
- 749
- 750 Zoubovsky, S.P., Hoseus, S., Tumukuntala, S., Schulkin, J.O., Williams, M.T., Vorhees, C.V. &  
751 Muglia, L.J. (2020) Chronic psychosocial stress during pregnancy affects maternal  
752 behavior and neuroendocrine function and modulates hypothalamic CRH and nuclear  
753 steroid receptor expression. *Transl Psychiatry*, **10**, 6.
- 754

755 **Figures and legends**

756

757

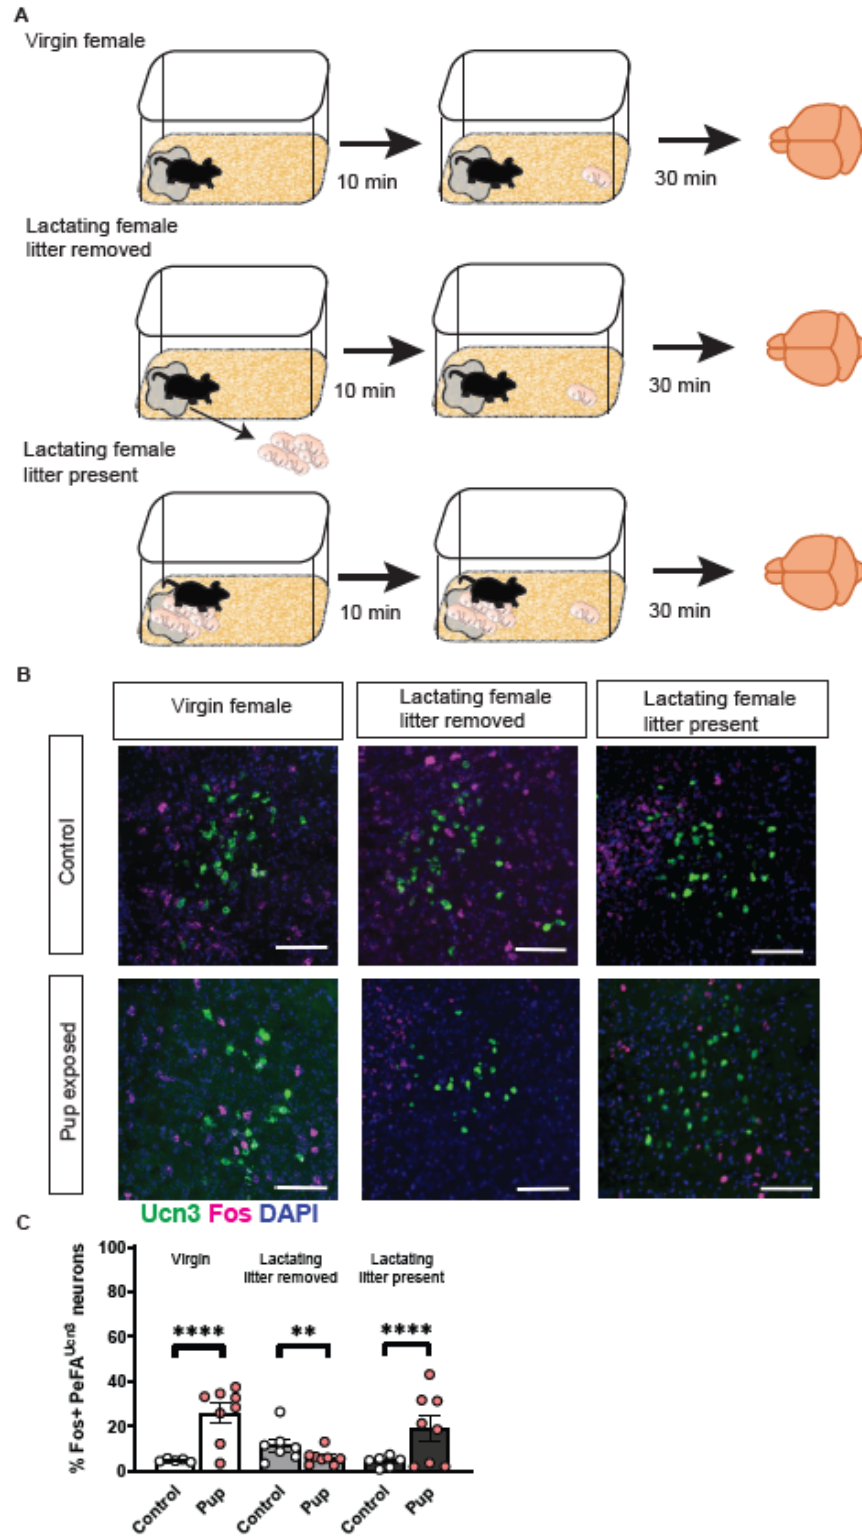

758

759 **Figure 1. PeFA Urocortin-3 neuronal activation levels in response to foreign pups**

760 **depends on physiological context. (A) Schematic of behavioral paradigm. C57 virgin females**

761 were exposed to a newborn pup and sacrificed 30 minutes after pup exposure or addition of  
762 fresh bedding into home cage (control). Lactating females either had a litter removed or litter  
763 intact and exposed to a foreign-born pup or fresh bedding. **(B)** Rostral perifornical area cells  
764 containing *Urocortin-3* and *Fos* RNA were counted for colocalization in each group. (scale bar  
765 100  $\mu\text{m}$ ) **(C)** Quantification of percentage of Ucn3+ cells colocalized with Fos across groups.  
766 Fisher exact test reveals that pup exposure increases PeFA<sup>Ucn3</sup> activation in virgin females  
767 (Control n=605 N=5; Pup exposed n=655 N=8; \*\*\*\*p<0.0001), reduced PeFA<sup>Ucn3</sup> activation in  
768 lactating females with litter removed (Control n=622 N=7; pup exposed n=828 N=8;  
769 \*\*p=0.0044), and increased activation in lactating females that did not have litter removal  
770 compared to control bedding exposure (Control n=816 N=6; pup exposed n=988 N=8  
771 \*\*\*\*p<0.0001).  
772

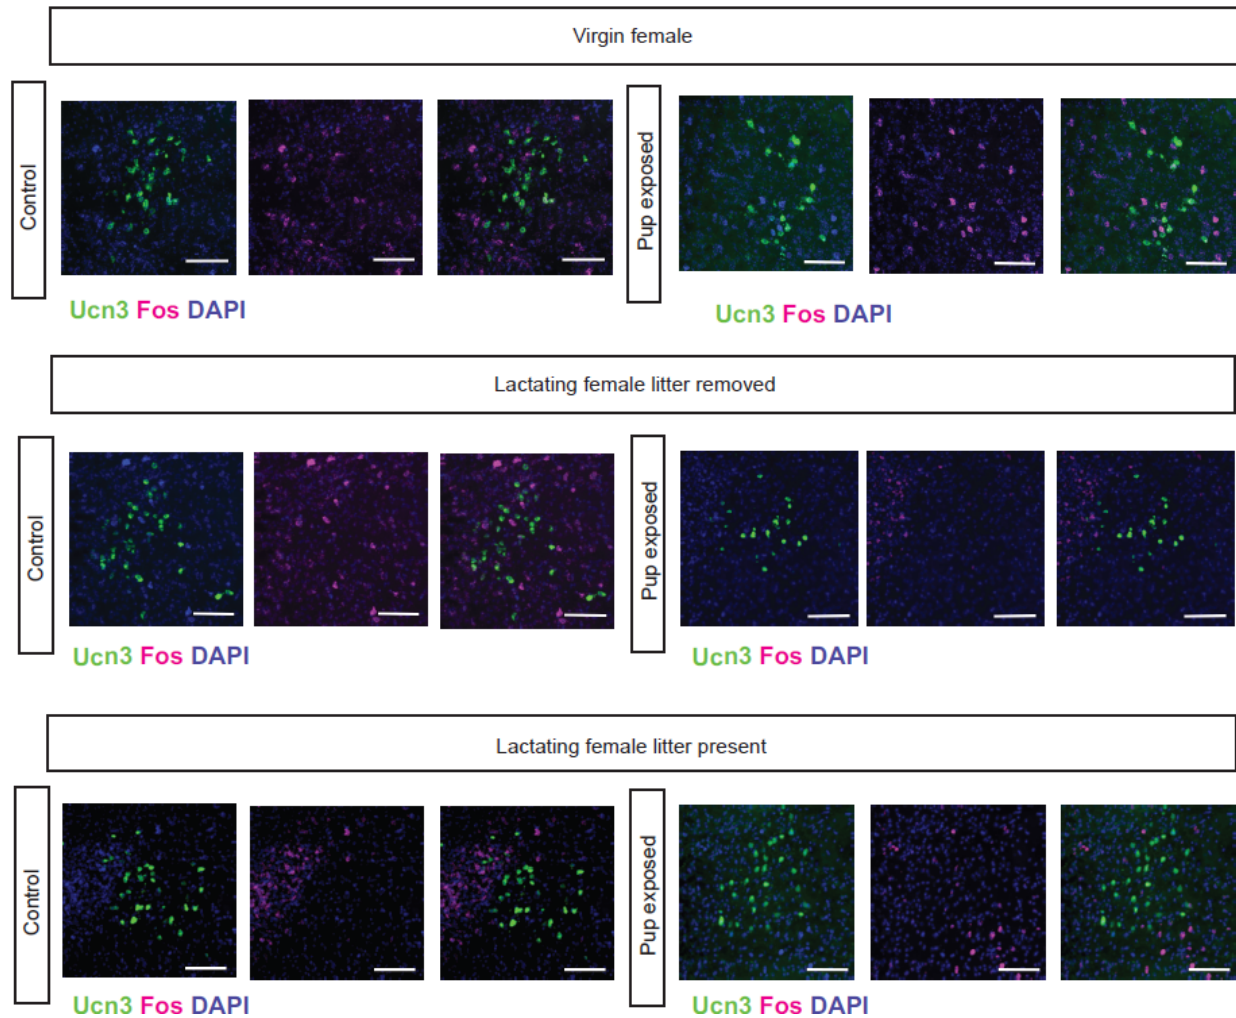

773

774 **Supplemental Figure 1-1. Colocalization of PeFA Urocortin-3 neurons with Fos in**  
775 **response to foreign pups.** Representative images from Figure 1 with Ucn3 and Fos channels  
776 separated (scale bar 100  $\mu$ m).

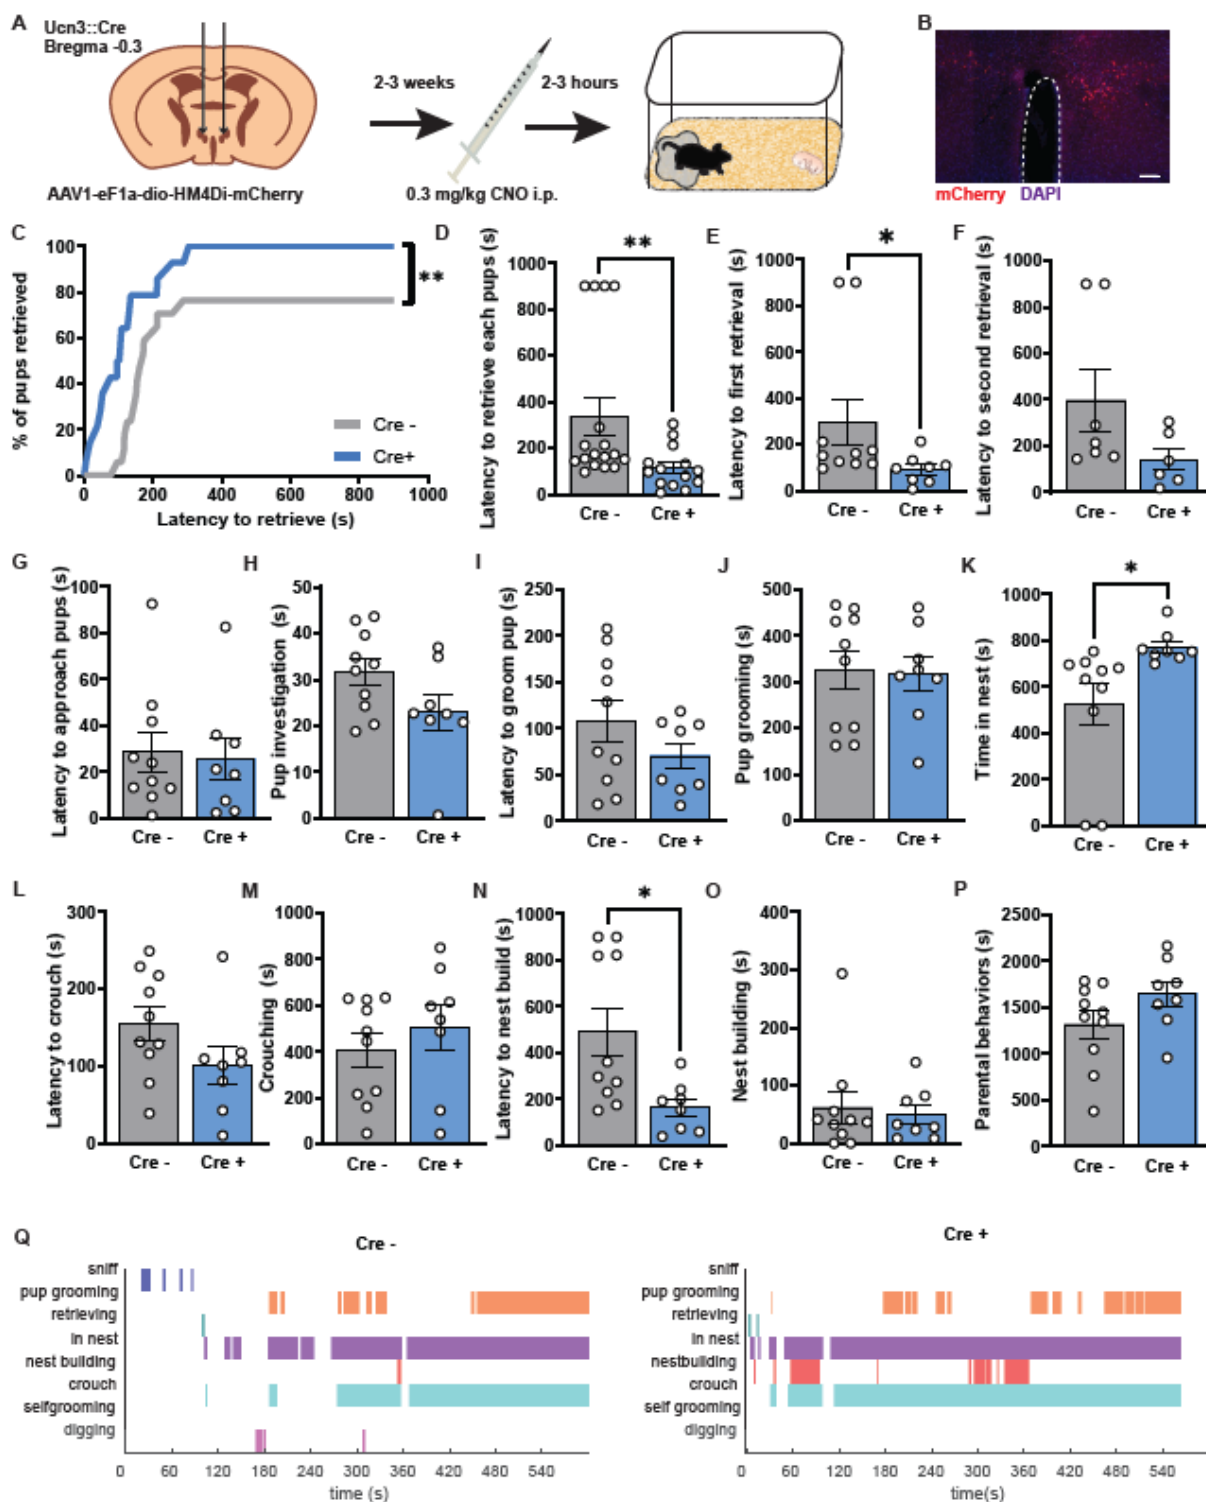

777  
778 **Figure 2. Inhibition of PeFA<sup>Ucn3</sup> neurons enhances alloparental behavior in virgin female**  
779 **mice. (A) Schematic of viral injection strategy and behavior timeline (n=10 Cre- females; n=8**



780 Cre+ females). **(B)** Representative image of mCherry reporter expression in Ucn3::Cre+  
781 female injected with inhibitory DREADD virus (magenta: mCherry; blue: DAPI; scale bar 100  
782  $\mu\text{m}$ ). **(C)** Percentage of pups retrieved by Cre+ females is significantly increased compared to  
783 Cre- females (Kolmogorov-Smirnov test  $p=0.0048$ ). **(D)** Latency to retrieve pups is significantly  
784 faster in Cre+ females compared to Cre- females (Two-tailed Mann-Whitney test;  $p=0.0033$ ), as  
785 well as **(E)** latency to retrieve the first pup (Two-tailed Mann-Whitney test;  $p=0.0259$ ), but there  
786 was no difference between groups in **(F)** latency to retrieve the second pup. **(G-H)** Latency to  
787 approach pups was not significantly different, but time spent investigating pups trended lower in  
788 Cre+ animals (Unpaired t test;  $p=0.0854$ ). **(I-J)** We observed no significant difference in latency  
789 to pup groom or in time spent pup grooming in Cre+ animals compared to Cre- females. **(K)**  
790 Time spent in nest with pups significantly increased in Cre+ animals (Unpaired t test;  $p=0.0289$ ).  
791 **(L-M)** Latency to crouch trended lower in Cre+ animals (Two-tailed Mann-Whitney test;  
792  $p=0.1011$ ), but we did not observe a significant difference in time spent crouching. **(N-O)**  
793 Latency to nest build was significantly faster in Cre+ animals (Two-tailed Mann-Whitney test;  
794  $p=0.0152$ ) but time spent nest building was not significantly different between groups. **(P)**  
795 Cumulative time spent parenting was unchanged between groups **(Q)** Representative behavior  
796 trace of a Cre- animal (left) and a Cre+ animal (right) during pup assay (time 0 is when pup was  
797 added to home cage).  
798

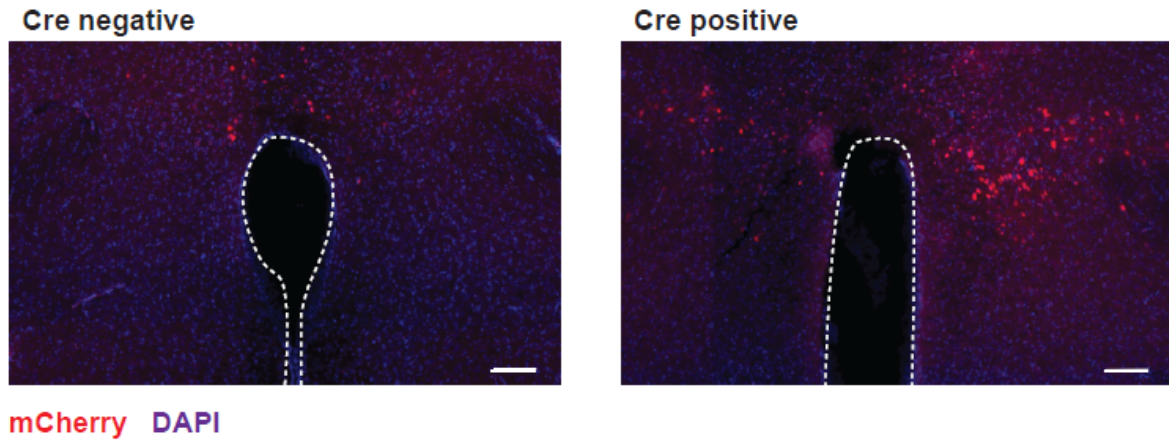

799

800 **Supplemental Figure 2-1. Inhibitory DREADD expression in virgin female mice.**

801 Representative image of AAV-mediated hM4di DREADD expression in the perifornical area  
802 (PeFA) of Ucn::Cre- (left) or Ucn3::Cre+ (right) females. Third ventricle indicated by outline  
803 (scale bar 100  $\mu$ m).

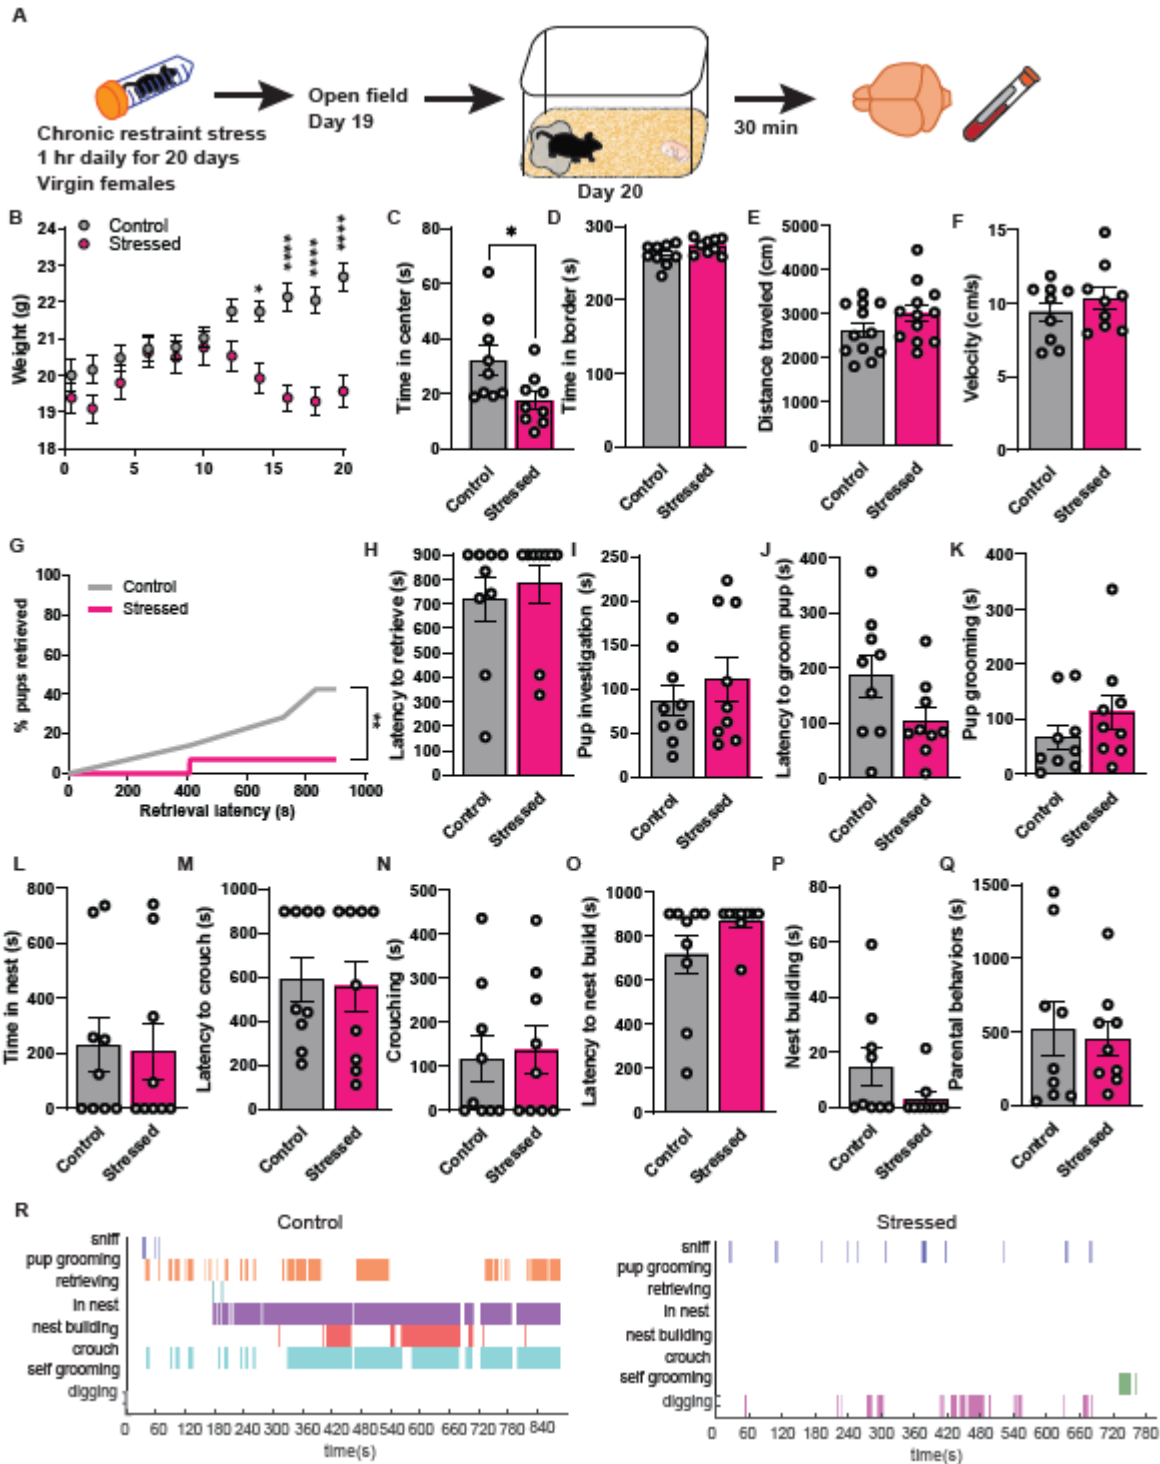

804

805

806 **Figure 3. Chronic restraint stress dampens alloparental behavior in virgin female mice.**

807 **(A)** Schematic of timeline using restraint stress paradigm and behavioral testing in virgin

808 females (n=9 control; n=9 stress). **(B)** Weights taken from each group during the period of  
809 chronic restraint stress. Stressed females have significant difference in weight compared to  
810 controls (Two-way repeated measures ANOVA; main effect of interaction of stress x time  
811  $F_{(10,220)}=22.92$   $p<0.0001$ ; main effect of time  $F_{(10, 220)} = 20.35$ ; Bonferroni's multiple comparisons  
812 test) **(C-F)** Time spent in center of open field was significantly reduced for stressed females  
813 compared to controls (C) (unpaired t test;  $p=0.0289$ ) but no other parameter in open field was  
814 changed. **(G)** Chronic restraint stress significantly decreased cumulative pup retrieval in females  
815 (Kolmogorov-Smirnov test  $p=0.0059$ ). **(H-Q)** Chronic restraint stress did not significantly change  
816 other parenting measures such as retrieval latency, or time spent pup grooming, time in nest,  
817 crouching, and nest building. **(R)** Representative behavior trace for a control female (left) and  
818 stressed female (right) during pup assay. (\* $p=0.05$ ; \*\* $p=0.01$ ; \*\*\* $p=0.001$ ; \*\*\*\* $p=0.0001$ ).

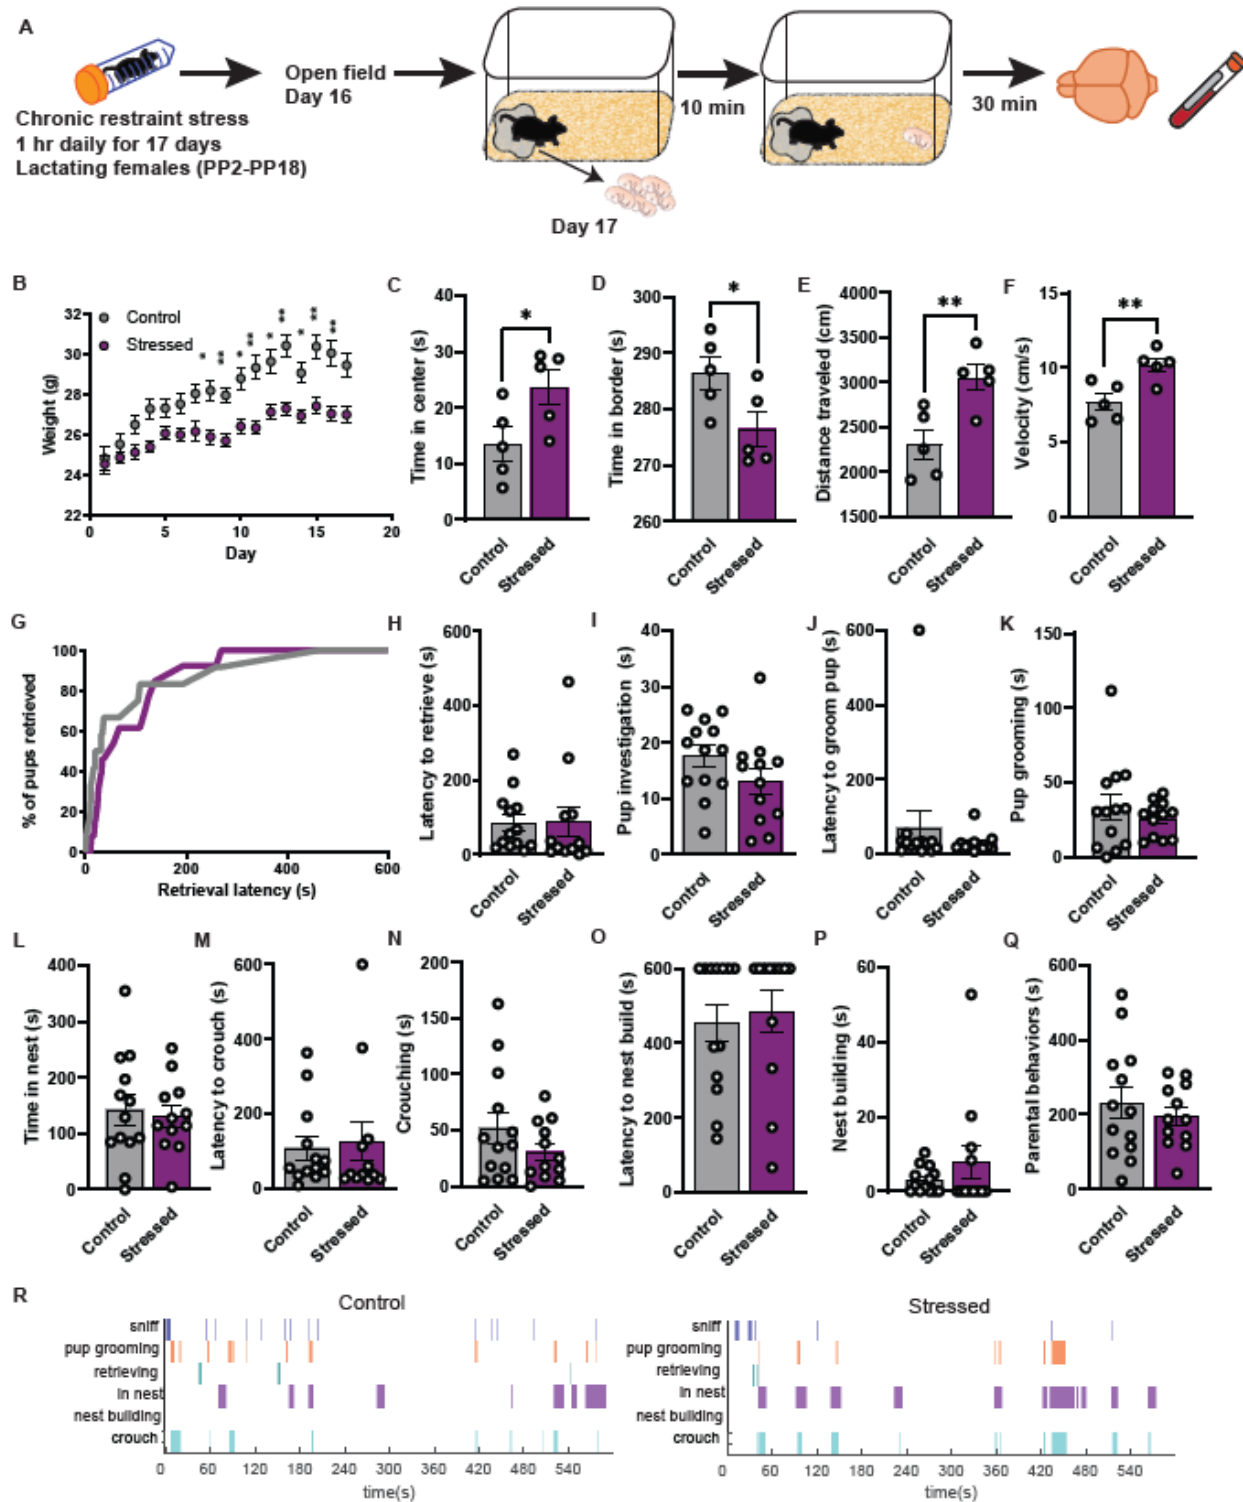

819

820 **Figure 4. Chronic restraint stress does not induce changes in parental behavior in**

821 **lactating females. (A) Schematic of timeline using restraint paradigm and behavioral testing in**

822 lactating females (Control n=12; Stressed n=13). **(B)** Weights taken from each group during the  
823 period of chronic restraint stress from postpartum day 1 to 18. Stressed females have a  
824 significant difference in weight compared to controls (Two-way repeated measures ANOVA;  
825 main effect of interaction of stress x time  $F_{(17,368)}=8.286$   $p<0.0001$ ; main effect of time  
826  $F_{(7.579,174.3)}=75.28$   $p<0.0001$ ; Sidak's multiple comparisons). **(C-F)** Time spent in center of open  
827 field was significantly increased for stressed females compared to controls (unpaired t test;  
828  $p=0.0459$ ) and time spent in borders decreased (unpaired t test;  $p=0.0459$ ) accompanied by  
829 increased distance traveled (unpaired t test;  $p=0.0089$ ) and velocity (unpaired t test;  $p=0.0089$ )  
830 **(G-Q)** Chronic restraint stress did not significantly change any parenting measures as retrieval,  
831 pup grooming, time in nest, crouching, and nest building compared to females that did not  
832 receive stress. **(R)** Representative behavior trace for a control female (left) and stressed female  
833 (right) during pup assay.  
834

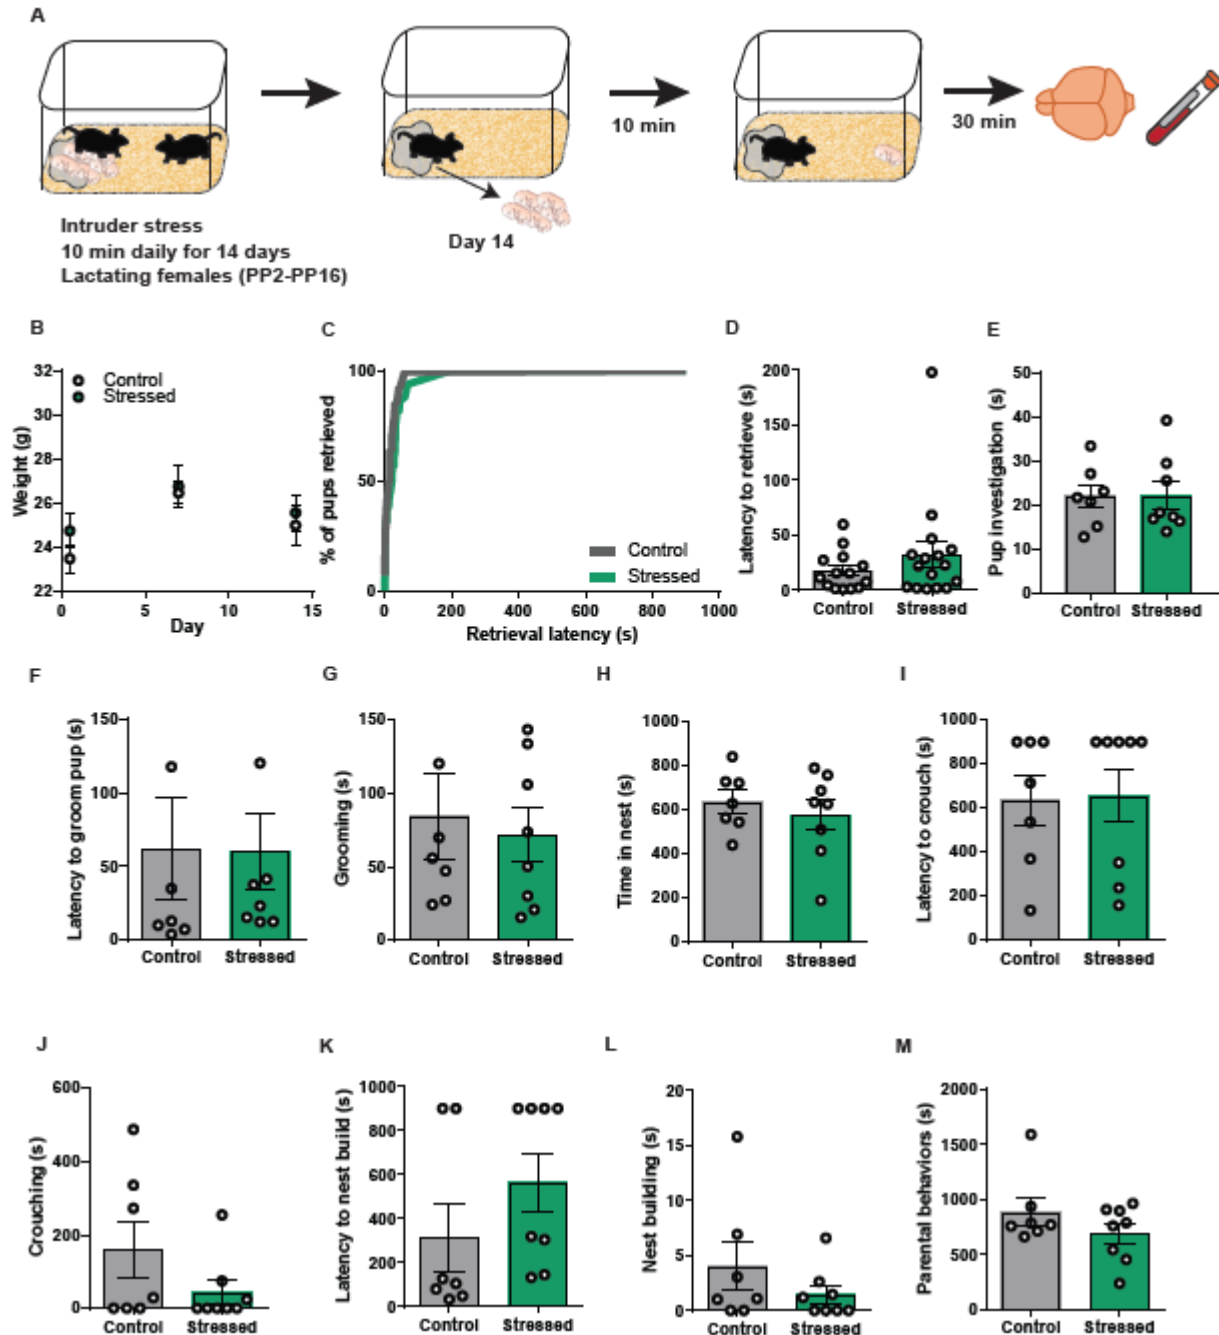

835

836 **Supplemental Figure 4-1. Intruder stress in lactating females does not impact weight or**

837 **parental behavior. (A)** Experimental paradigm for intruder stress in lactating females. **(B)**

838 Weight was not affected by stress condition. **(C)** Percentage of pups retrieved was not

839 significantly different between control and stressed females. **(D)** Latency to retrieve **(E)** Pup

840 investigation **(F)** Latency to groom **(G)** Grooming duration **(H)** Time in the nest **(I)** Latency to

841 crouch **(J)** Crouching duration **(K)** Latency to nest build **(L)** Nest building duration and **(M)**

842 Parental behaviors were unchanged between stress and control mothers.

843



844

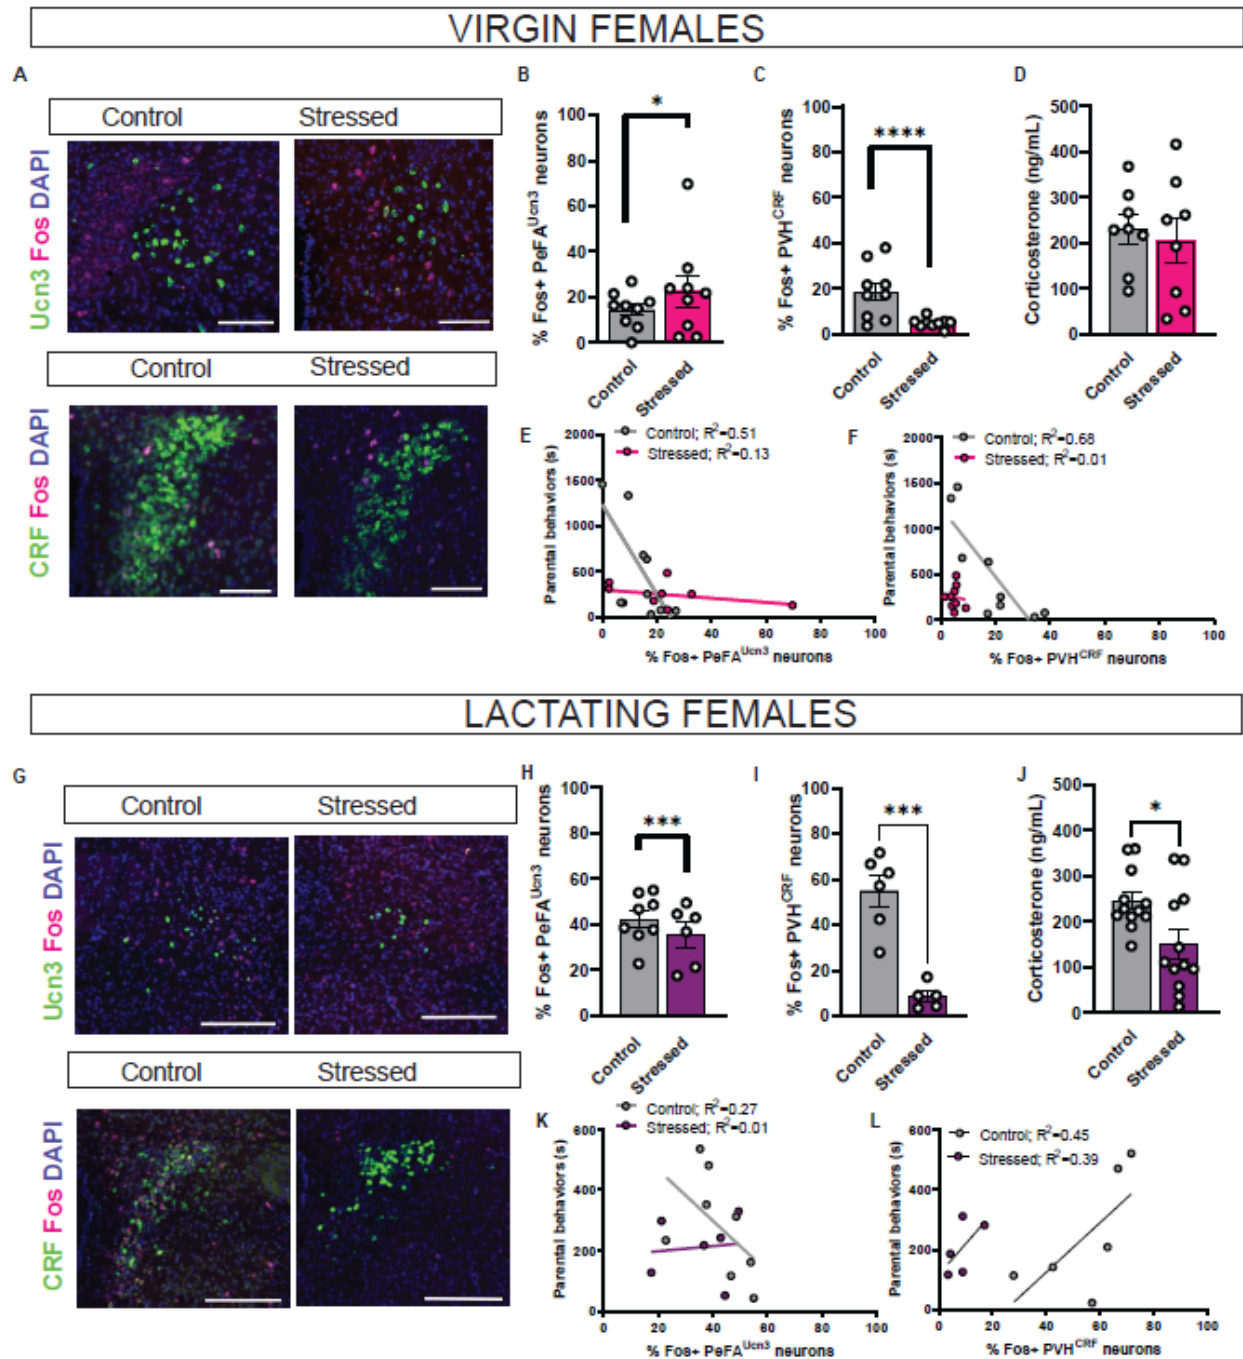

845

846 **Figure 5. Chronic restraint leads to contrasting molecular changes between virgin and**  
 847 **lactating females in parenting. (A)** Rostral perifornical area cells containing *Ucn3*, *CRF*, and  
 848 *Fos* RNA were counted for colocalization in each virgin female group. (scale bar 100  $\mu$ m). **(B)**

849 Colocalization of *Ucn3* and *Fos* in perifornical area reveals increased of activation of PeFA<sup>Ucn3</sup>  
850 neurons in in stressed virgin females compared to control virgin females (Fisher exact test:  
851 Control n=490 N=9; Stressed n=472 N=9; p=0.038). **(C)** Colocalization of *CRF* and *Fos* in  
852 paraventricular nucleus of the hypothalamus reveals decreased activation of PVH<sup>CRF</sup> neurons in  
853 stressed virgin females compared to control virgin females (Fisher exact test: Control n=1305  
854 N=9; Stressed n=1272 N=9; p<0.0001). **(D)** Serum corticosterone levels were measured using  
855 ELISA in virgin females. Chronic restraint stress did not contribute to altered corticosterone in  
856 virgin females. **(E)** Plotting time spent parenting against PeFA<sup>Ucn3</sup> activation levels shows  
857 marked negative correlation between parenting and PeFA<sup>Ucn3</sup> neuron activation in controls but  
858 this relationship is abolished in stressed virgin females (Control R<sup>2</sup>=0.51 Stressed R<sup>2</sup>=0.13;  
859 difference in slope F= 10.73 DF<sub>n</sub>=1, DF<sub>d</sub>=14; p=0.0055). **(F)** PVH<sup>CRF</sup> activation levels in  
860 negatively correlated with time spent parenting in control virgin females but this relationship is  
861 indiscernible in stressed virgin females (Control R<sup>2</sup>=0.68 Stressed R<sup>2</sup>=0.01). **(G)** Rostral  
862 perifornical area cells containing *Ucn3*, *CRF*, and *Fos* RNA were counted for colocalization in  
863 each lactating female group (scale bar 100 μm). **(H)** PeFA<sup>Ucn3</sup> neuron activation levels are  
864 reduced in stressed lactating females (Fisher exact test: Control n=338 N=8; Stressed n=360  
865 N=6; p=0.0005). **(I)** Activation levels of CRF cells in the paraventricular nucleus of the  
866 hypothalamus are significantly decreased in stressed lactating females (Control n=919 N=6;  
867 Stressed n=2268 N=5; p<0.0001). **(J)** Chronic restraint stress significantly reduced  
868 corticosterone in lactating females (unpaired t test; p=0.0198). **(K)** Linear regression analysis  
869 reveals a trend towards negative correlation between time spent parenting and PeFA<sup>Ucn3</sup>  
870 activation levels in control lactating females but not in the stressed group (Control R<sup>2</sup>=0.27  
871 Stressed R<sup>2</sup>=0.01). **(L)** PVH<sup>CRF</sup> activation is positively correlated with time spent parenting  
872 (Control R<sup>2</sup>=0.45 Stressed R<sup>2</sup>=0.39).  
873

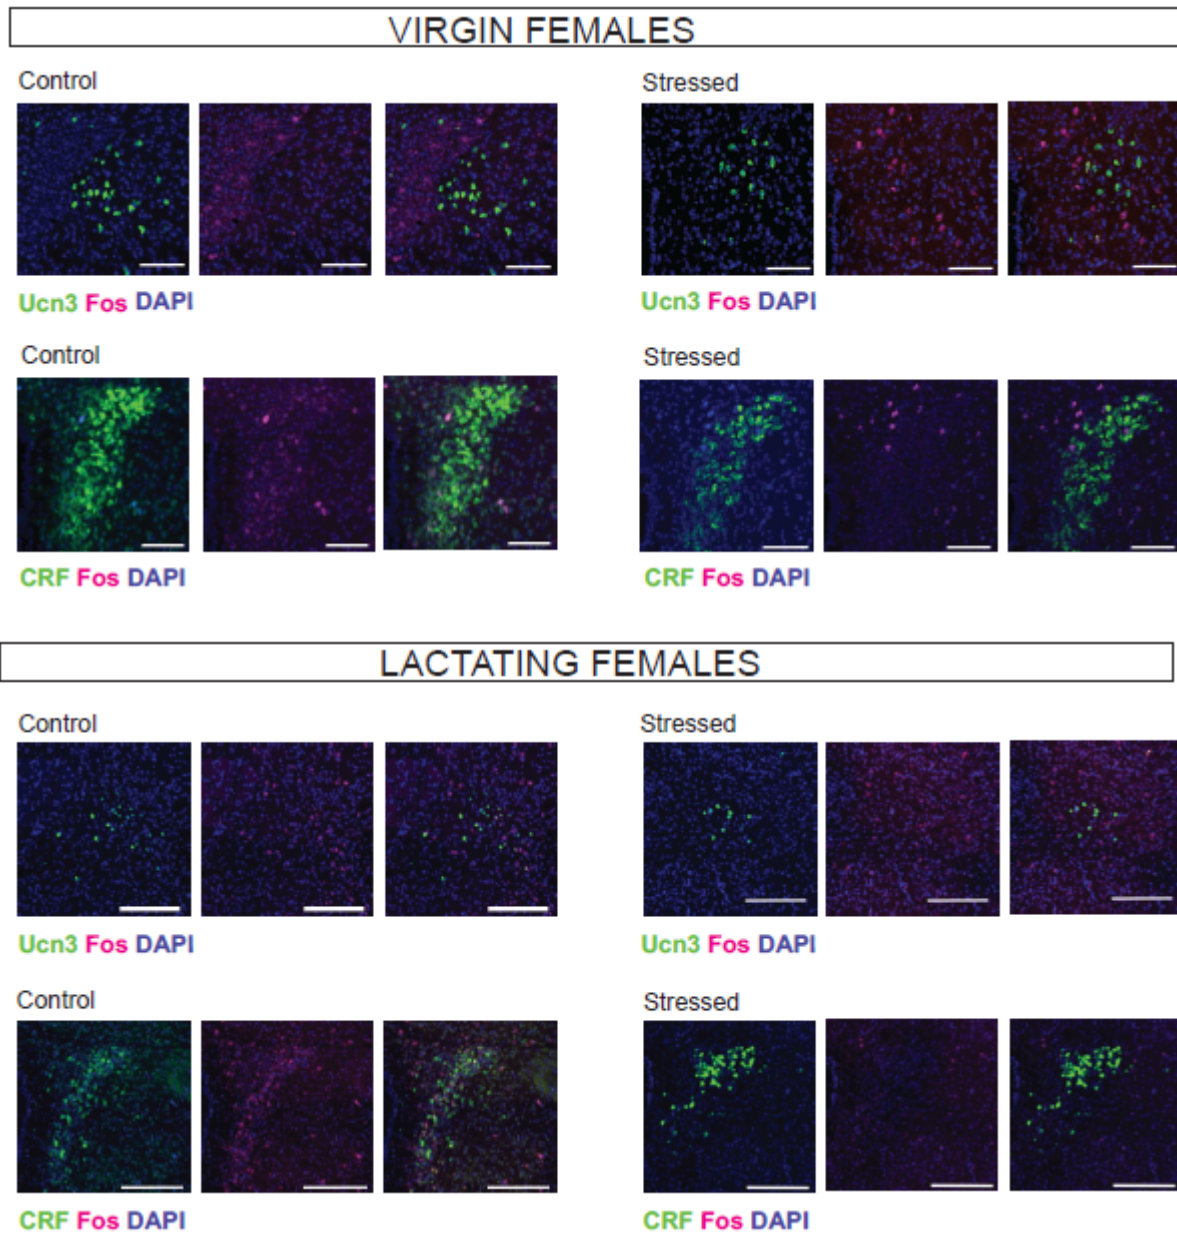

874

875 **Supplemental Figure 5-1. Colocalization of Ucn3 or CRF and Fos in virgin or lactating**  
876 **females exposed to pups in control or chronic restraint stress conditions.** Representative  
877 images from Figure 5 with Ucn3 or CRF and Fos channels separated (Ucn3 or CRF green  
878 channel; Fos magenta channel; scale bar 100  $\mu$ m).

879

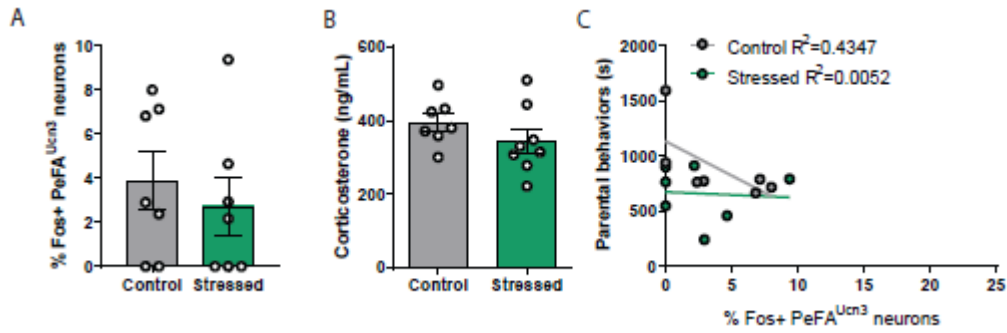

880

881 **Supplemental Figure 5-2. Intruder stress in lactating females does not affect PeFA<sup>Ucn3</sup>**

882 **neuronal activation levels or circulating corticosterone. (A)** Percentage of Fos+ PeFA<sup>Ucn3</sup>

883 neurons is not significantly different between mothers with or without intruder stress. **(B)**

884 Corticosterone levels are indistinguishable between mothers with or without intruder stress. **(C)**

885 Linear regression analysis reveals a trend towards negative correlation between time spent

886 parenting and PeFA<sup>Ucn3</sup> activation levels in control lactating females but not in mothers with

887 intruder stress (Control R<sup>2</sup>=0.4347 Stressed R<sup>2</sup>=0.0052).

888

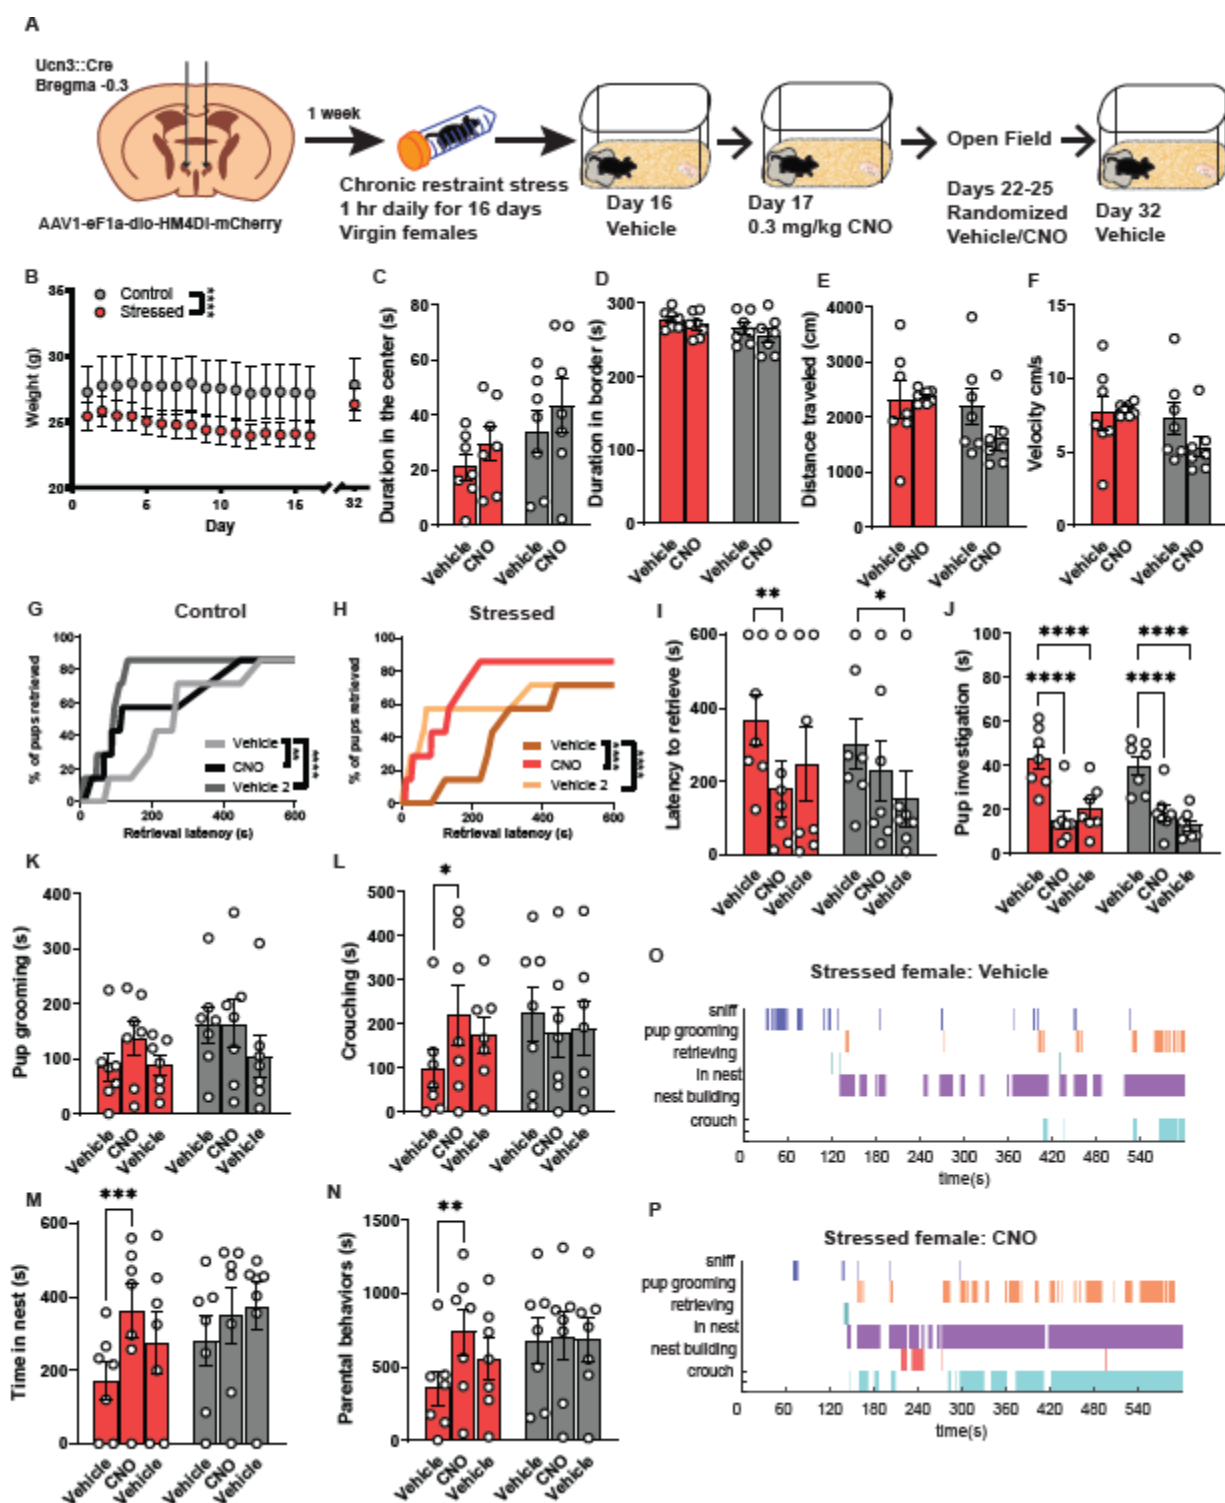

889

890

891 **Figure 6. PeFA<sup>Ucn3</sup> inhibition ameliorates parenting deficits in stressed virgin females. (A)**

892 Schematic of viral injection strategy and behavior timeline (n=7 stressed Cre+ females; n=7



893 control Cre+ females). **(B)** Stressed females had a significant difference in weight compared to  
894 control females (2-way repeated measures ANOVA, main effect of stress x time  $p < 0.0001$ ). **(C-**  
895 **F)** Open field results show no difference in time spent in center, border, distance moved, or  
896 velocity in control or stressed mice with or without CNO treatment. **(G)** Cumulative pup retrieval  
897 in control animals improves significantly with CNO injection (Friedman's test;  $p = 0.0013$ ). **(H)**  
898 Cumulative pup retrieval in stressed animals improve with CNO administration (Friedman's test;  
899  $p = 0.0003$ ). **(I)** CNO treatment decreases latency to retrieve in stressed females (Two-way  
900 repeated measures ANOVA, main effect time  $F_{(2,24)} = 8.978$   $p < 0.01$ ; Sidak's multiple comparisons  
901 test) but not in control animals. **(J)** Pup investigation dramatically reduces in both animal groups  
902 with CNO (Two-way repeated measures ANOVA, main effect of time  $F_{(2,24)} = 82.86$   $p < 0.0001$ ;  
903 Sidak's multiple comparisons test). **(K)** Pup grooming is unchanged with CNO treatment. **(L)**  
904 Time spent crouching increases with CNO administration in stressed females (Two-way  
905 repeated measures ANOVA, main interaction effect of stress and drug  $F_{(2,24)} = 3.506$   $p < 0.0462$ ;  
906 Tukey's multiple comparisons). **(M)** Stressed females spent significantly more time in the nest  
907 with CNO administration (Two-way repeated measures ANOVA, main effect of time  $F_{(2,24)} = 9.399$   
908  $p = 0.001$ ; Sidak's multiple comparison's test). **(N)** Cumulative time spent parenting increases  
909 with CNO treatment in stressed females (Two-way ANOVA, main effect of time  $F_{(2,24)} = 3.942$   
910  $p = 0.0331$ ; Sidak's multiple comparisons). **(O-P)** Representative behavior traces showing  
911 induction of more parenting behaviors with CNO in stressed females. (Significant post-hoc  
912 comparisons noted as follows: \* $p = 0.05$ ; \*\* $p = 0.01$ ; \*\*\* $p = 0.001$ ; \*\*\*\* $p = 0.0001$ ).  
913

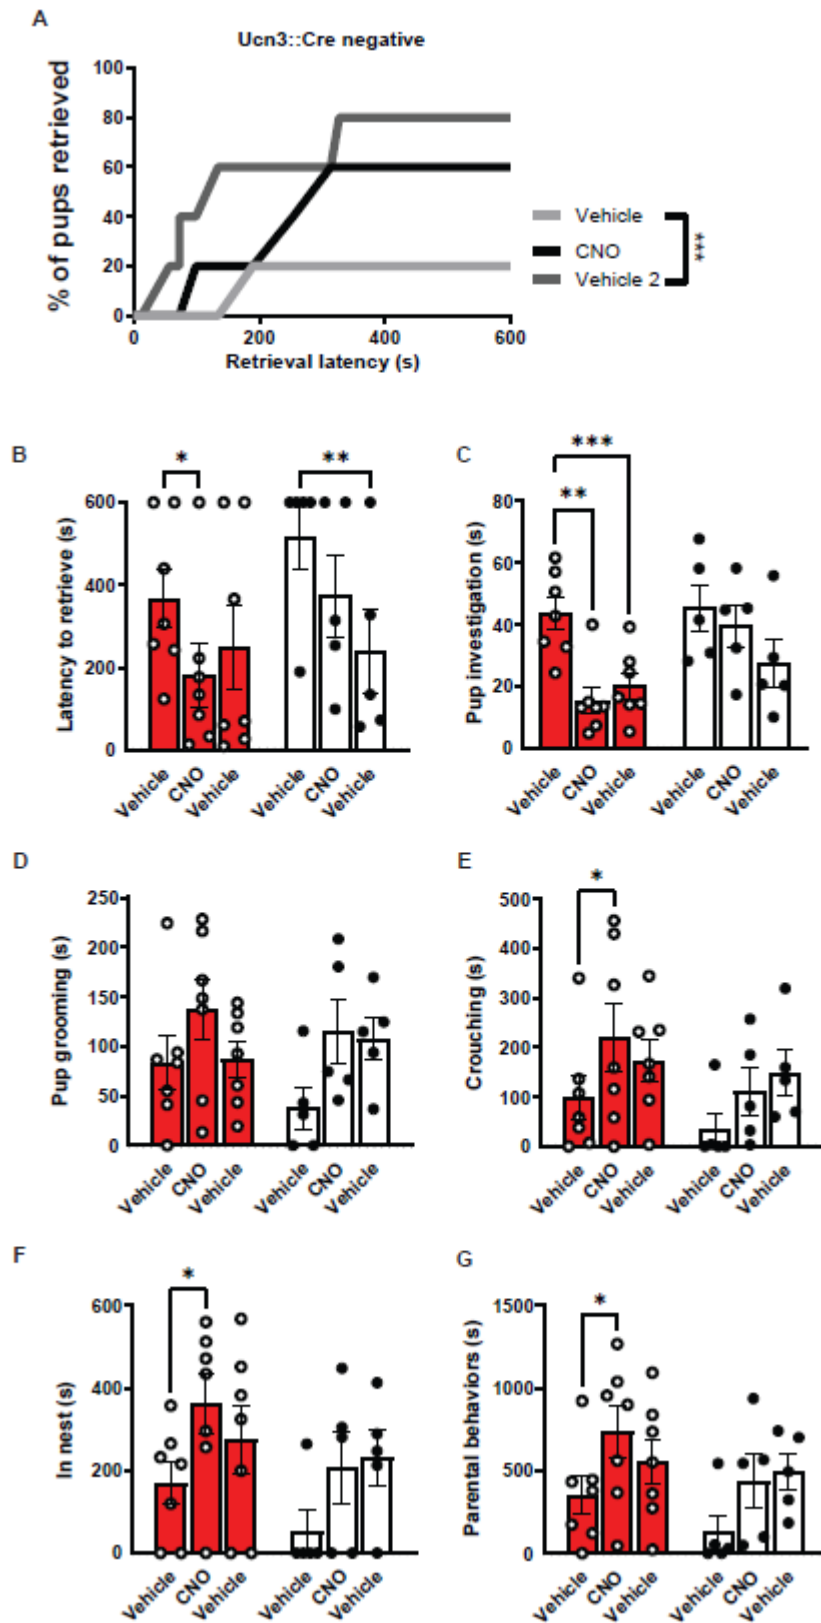

915 **Supplemental Figure 6-1. CNO treatment does not impact parenting behavior in**  
916 **Ucn3::Cre- stressed virgin females. (A)** Cumulative pup retrieval in control animals improves  
917 significantly with CNO injection (Friedman's test;  $p=0.0002$  followed by Dunn's posthoc  
918 comparisons). **(B)** CNO reduces latency to retrieve pups in stressed Ucn3::Cre+ females but not  
919 in stressed Cre- females (Two-way repeated measures ANOVA main effect of drug treatment  
920  $F_{(2,20)}=9.667$   $p<0.0012$ , Sidak multiple comparisons post-hoc effect significant for Cre+ stressed  
921 group vehicle versus CNO  $p<0.0224$  and Cre- stressed group vehicle vs. vehicle 2  $p<0.0036$ ).  
922 **(C)** Pup investigation is impacted in the stressed Cre+ group but not the stressed Cre- group  
923 (Two-way repeated measures ANOVA main effect of drug treatment  $F_{(2,20)}=10.94$   $p<0.0006$ ,  
924 Sidak multiple comparisons post-hoc effect significant for Cre+ stressed group vehicle versus  
925 CNO  $p<0.0010$  and vehicle versus vehicle 2  $p<0.0009$ ). **(D)** Pup grooming is unaffected. **(E)**  
926 CNO treatment increases crouching significantly in Ucn3::Cre positive females (Two-way  
927 repeated measures ANOVA main effect of drug treatment  $F_{(2,20)}=4.898$ ,  $p<0.0186$ , Tukey  
928 multiple comparisons post-hoc effect significant for Cre+ stress group vehicle versus CNO  
929  $p<0.05$ ) **(F)** as well as duration in nest (Two-way repeated measures ANOVA main effect of  
930 drug treatment  $F_{(2,20)}=8.098$ ,  $p<0.0037$ , Sidak multiple comparisons post-hoc effect significant  
931 for Cre+ stress group vehicle versus CNO  $p<0.05$ ) **(G)** and cumulative time spent parenting  
932 (Two-way repeated measures ANOVA main effect of drug treatment  $F_{(2,20)}=7.728$   $p<0.0033$ ,  
933 Sidak multiple comparisons post-hoc effect significant for Cre+ stress group vehicle versus CNO  
934 ( $p<0.05$ ).  
935



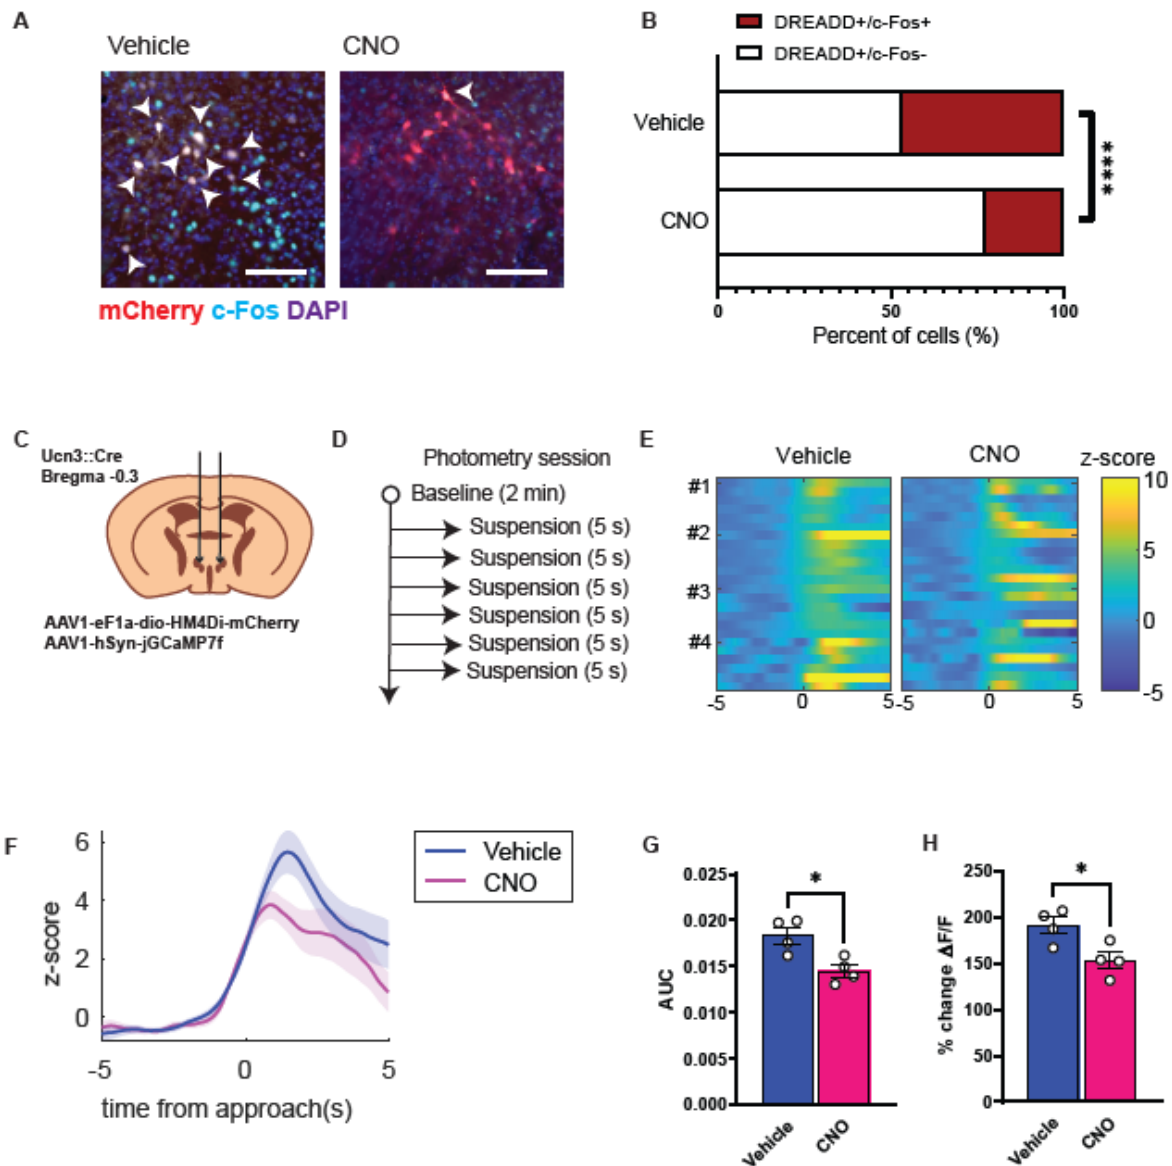

936

937

938

939 **Supplemental Figure 6-2. Confirmation of CNO reduction of PeFA<sup>Ucn3</sup> on AAV-mediated**  
 940 **hM4di in Ucn3::Cre females. (A)** Representative image of changes in PeFA<sup>Ucn3</sup>/c-Fos levels in  
 941 AAV-hM4di DREADD injected Ucn3::Cre females when CNO is injected intraperitoneally  
 942 compared to vehicle after 30 minutes of pup interaction (scale bar 100  $\mu$ m). Arrow indicates

943 Ucn3/c-Fos colocalization. **(B)** Quantification of DREADD expressing neurons co-expressing c-  
944 Fos is significantly reduced in Ucn3::Cre females injected with CNO. (Fisher exact test: Vehicle  
945 n=180 N=2; Stressed n=101 N=2;  $p < 0.0001$ ). **(C)** Schematic of experimental design to record  
946 photometric signals from the PeFA with expression of inhibitory DREADD hM4Di construct in  
947 the PeFA<sup>Ucn3</sup> neurons. **(D)** Schematic of tail suspension session design during photometry  
948 recording. **(E)** Z-score of the normalized fluorescence signal ( $\Delta F/F$ ) for each individual trial  
949 during the 10s peri-event window centered around the onset of tail suspension. Left: vehicle;  
950 right: CNO treatment (n=6 trials, N= 4 female mice) **(F)** Average Z-score of  $\Delta F/F$  averaged  
951 across the 6 trials for each of the four females (dark line represents the mean and the shaded  
952 area represents the SEM). **(G)** Area under the curve calculated on the average  $\Delta F/F$  signal for  
953 the tail suspension events (n=6 trials, N=4 female mice). AUC of the 5s segment following the  
954 suspension is significantly reduced in the CNO trial compared to vehicle treatment (Paired t-test  
955  $p < 0.0281$ , N=4 female mice, average of 6 trials for each). **(H)** Percent change of  $\Delta F/F$  relative  
956 to baseline reveals significant reduction of fluorescence evoked by tail suspension with CNO  
957 treatment relative to vehicle treatment (Paired t-test  $p < 0.0025$ , N=4 female mice, average of 6  
958 trials for each).

959

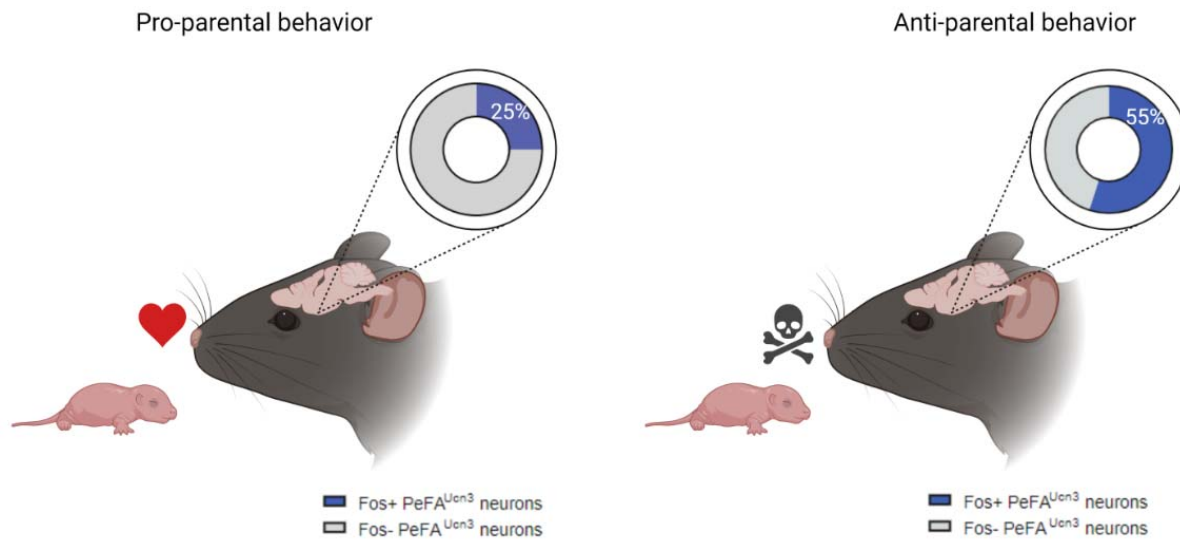

960

961 **Supplemental Figure 6-3. Model for PeFA<sup>Ucn3</sup> neuronal activation in pup-directed**

962 **behavior across sexes and physiological states. (Left) Pro-parental behavior such as**

963 grooming, retrieving, and crouching over pups in the nest is accompanied by low-level PeFA<sup>Ucn3</sup>

964 neuronal activation (~25%). Mice in this category include alloparental virgin females, unstressed

965 mothers, and stress-resistant mothers, as demonstrated in this study and Autry et al. 2021. We

966 predict that this level of activation of PeFA<sup>Ucn3</sup> neurons may also be observed in other categories

967 of mice that display pro-parental behavior including alloparental virgin males, unstressed

968 fathers, and stress-resistant fathers. **(Right)** On the other hand, anti-parental behavior such

969 infant-directed aggression or neglect is accompanied by increased activation of PeFA<sup>Ucn3</sup>

970 neurons (~55%). Mice in this category include stressed virgin females and infanticidal males as

971 demonstrated in this study and Autry et al., 2021. We predict that this level of activation of

972 PeFA<sup>Ucn3</sup> neurons may also be observed in other categories of mice that display anti-parental

973 behavior including stress-susceptible mothers, stressed virgin males, and stress-susceptible

974 fathers. Model created with Biorender.com.

975

976
